# Supplementary material
Source: publisher site journal article supplement (https://bdj.pensoft.net/article/download/suppl/5353845/)
Supplement: Supplementary file 1

## Sheet: Suppl_mat_3
Number	Phylum	Class	Order	Family	Genus	Species	GenBank CO1 ID	GenBank CO1 ID	Mismatch	Match %	BOLD CO1 ID	BOLD CO1 ID	Match (%)	Location	Site	Collection date	Barcode length	ZRC code	GenBank Accession Number
IP0001	Cnidaria	Anthozoa	Scleractinia	Poritidae	Porites	lutea	Porites	lutea	0	99	Porites	lutea	100	Pulau Subar Laut	Big lagoon south seawall	20150705	long	ZRC.CNI.1240	MN690335
IP0002	Arthropoda	Malacostraca	Decapoda	Pilumnidae	Pilumnus	vespertilio	Uca	umbratila	0	88	Pilumnus	vespertilio	99.68	Pulau Subar Laut	Big lagoon south seawall	20150705	short	ZRC 2017.1110	MN689977
IP0003	Cnidaria	Anthozoa	Scleractinia	Acroporidae	Montipora	grisea	Montipora	digitata	1	100	Montipora	verrilli	100	Pulau Subar Laut	Big lagoon south seawall	20150705	long	ZRC.CNI.1241	MN690343
IP0004	Mollusca	Cephalopoda	Octopoda	Octopodidae			Octopus	cf. vitiensis		98	Octopus	oliveri	89.76	Pulau Subar Laut	Big lagoon south seawall	20150705	long		MN690163
IP0005	Mollusca	Cephalopoda	Octopoda	Octopodidae			Octopus	cf. vitiensis		98	Octopus	oliveri	89.76	Pulau Subar Laut	Big lagoon south seawall	20150705	long		MN690164
IP0006	Cnidaria	Anthozoa	Scleractinia	Euphylliidae	Galaxea	fascicularis	Galaxea	fascicularis	0	99	Galaxea	fascicularis	100	Pulau Subar Laut	Big lagoon south seawall	20150705	short	ZRC.CNI.1242	MN690345
IP0007	Nemertea	Anopla	-	Valenciniidae	Baseodiscus	quinquelineatus	Baseodiscus	cf. delineatus	0	88	Nemertea		85.37	Pulau Subar Laut	Big lagoon centre seawall	20150705	long	ZRC.MIS.0005	MN690209
IP0008	Platyhelminthes	Rhabditophora	Polycladida	Pseudocerotidae	Pseudoceros	bifurcus								Pulau Subar Laut	Big lagoon south seawall	20150705
IP0009	Arthropoda	Malacostraca	Isopoda	Ligiidae	Ligia	exotica	Ligia	exotica	0	99	Ligia	exotica	99.65	Pulau Subar Laut	Big lagoon south seawall	20150705	long		MN690248
IP0010	Mollusca	Gastropoda	Nudibranchia	Phyllidiidae			Phyllidiopsis	fissurata		97	Phyllidiella	nigra	85.5	Pulau Subar Laut	Big lagoon south seawall	20150705	long		MN690281
IP0011	Mollusca	Gastropoda	Nudibranchia	Discodorididae	Jorunna	funebris	Jorunna	funebris	0	86	Rostanga	arbutus	84.1	Pulau Subar Laut	Big lagoon south seawall	20150705	long		MN690306
IP0012	Arthropoda	Malacostraca	Decapoda	Brachyura			Neoxanthops	lineatus		88	Neoxanthops	lineatus	87.72	Pulau Subar Laut	Big lagoon south seawall	20150705	short		MN689987
IP0013	Arthropoda	Malacostraca	Decapoda	Brachyura			Xanthidae			99	Decapoda		98.17	Pulau Subar Laut	Big lagoon south seawall	20150705	long		MN689994
IP0014	Mollusca	Gastropoda	Nudibranchia	Phyllidiidae	Phyllidiella	nigra	Phyllidiella	nigra	1	99	Nudibranchia		99.11	Pulau Subar Laut	Big lagoon south seawall	20150705	short		MN690283
IP0015	Mollusca	Gastropoda	Nudibranchia	Phyllidiidae	Phyllidiella	nigra	Phyllidiella	nigra	1	99	Phyllidiella	nigra	99.67	Pulau Subar Laut	Big lagoon south seawall	20150705	long		MN690284
IP0016	Mollusca	Gastropoda	Nudibranchia	Phyllidiidae	Phyllidiella	pustulosa								Pulau Subar Laut	Big lagoon south seawall	20150705
IP0017	Echinodermata	Holothuroidea	Aspidochirotida	Holothuriidae	Holothuria	leucospilota	Holothuria	leucospilota	0	99	Holothuria	leucospilota	100	Pulau Subar Laut	Big lagoon south seawall	20150705	short		MN690252
IP0018	Echinodermata	Asteroidea	Valvatida	Archasteridae	Archaster	typicus								Pulau Subar Laut	Big lagoon centre seawall	20150705
IP0019	Echinodermata	Asteroidea	Valvatida	Archasteridae	Archaster	typicus	Stellaster	equestris	0	83	Archaster	typicus	98.93	Pulau Subar Laut	Big lagoon centre seawall	20150705	long	ZRC.ECH.1230	MN690254
IP0020	Annelida	Polychaeta	Eunicida	Eunicidae			Palola			78	Eunice		81.1	Pulau Subar Laut	Big lagoon south seawall	20150705	long		MN690242
IP0021	Echinodermata	Ophiuroidea	Ophiurida	Ophiactidae	Ophiactis	savignyi								Pulau Subar Laut	Big lagoon south seawall	20150705
IP0022	Arthropoda	Malacostraca	Decapoda	Portunidae	Thalamita		Thalamita	prymna		99	Decapoda		99.83	Pulau Subar Laut	Big lagoon north seawall	20150705	long	ZRC 2017.1111	MN690008
IP0023	Arthropoda	Malacostraca	Decapoda	Alpheidae			Caridea			87	Decapoda		87.48	Pulau Subar Laut	Big lagoon south seawall	20150705	long		MN690009
IP0024	Arthropoda	Malacostraca	Decapoda				Caridea			85	Decapoda		93.27	Pulau Subar Laut	Big lagoon south seawall	20150705	long		MN690019
IP0025	Arthropoda	Malacostraca	Decapoda				Caridea			84	Decapoda		94.61	Pulau Subar Laut	Big lagoon south seawall	20150705	short		MN690023
IP0026	Arthropoda	Malacostraca	Decapoda				Caridea			85	Decapoda		94.61	Pulau Subar Laut	Big lagoon south seawall	20150705	short		MN690029
IP0027	Arthropoda	Malacostraca	Decapoda				Caridea			84	Decapoda		93.94	Pulau Subar Laut	Big lagoon south seawall	20150705	short		MN690030
IP0028	Arthropoda	Malacostraca	Decapoda				Periclimenes	wirtzi		83	Decapoda		93.4	Pulau Subar Laut	Big lagoon south seawall	20150705	long		MN690020
IP0029	Arthropoda	Malacostraca	Decapoda				Caridea			85	Decapoda		94.61	Pulau Subar Laut	Big lagoon south seawall	20150705	short		MN690024
IP0030	Arthropoda	Malacostraca	Decapoda				Caridea			84	Decapoda		93.94	Pulau Subar Laut	Big lagoon south seawall	20150705	short		MN690031
IP0031	Arthropoda	Malacostraca	Decapoda				Periclimenes	wirtzi		83	Decapoda		94.61	Pulau Subar Laut	Big lagoon south seawall	20150705	short		MN690025
IP0032	Arthropoda	Malacostraca	Decapoda				Caridea			85	Decapoda		94.61	Pulau Subar Laut	Big lagoon south seawall	20150705	short		MN690027
IP0033	Arthropoda	Malacostraca	Decapoda				Caridea			85	Decapoda		94.61	Pulau Subar Laut	Big lagoon south seawall	20150705	short		MN690028
IP0034	Annelida	Polychaeta	Sabellida	Sabellidae	Sabellastarte	indica	Sabellastarte			93	Sabellastarte		94.87	Pulau Subar Laut	Big lagoon centre seawall	20150705	long	ZRC.ANN.0365	MN690493
IP0035	Mollusca	Gastropoda	Cycloneritimorpha	Neritidae	Nerita	albicilla	Nerita	albicilla	0	100	Nerita	albicilla	99.85	Pulau Subar Laut	Big lagoon south seawall	20150705	long		MN690170
IP0036	Mollusca	Gastropoda	Cycloneritimorpha	Neritidae	Nerita		Nerita	undata		99	Nerita	undata	99.63	Pulau Subar Laut	Big lagoon south seawall	20150705	short		MN690173
IP0037	Mollusca	Gastropoda	Cycloneritimorpha	Neritidae	Nerita	undata	Nerita	undata	0	100	Nerita	undata	99.85	Pulau Subar Laut	Big lagoon south seawall	20150705	long		MN690172
IP0038	Mollusca	Gastropoda	Cycloneritimorpha	Neritidae	Nerita		Nerita	albicilla		100	Nerita	albicilla	100	Pulau Subar Laut	Big lagoon south seawall	20150705	long		MN690171
IP0039	Mollusca	Gastropoda	Cycloneritimorpha	Neritidae	Nerita		Nerita	undata		99	Nerita	undata	99.63	Pulau Subar Laut	Big lagoon south seawall	20150705	short		MN690175
IP0040	Cnidaria	Anthozoa	Alcyonacea	Alcyoniidae	Sarcophyton		Sarcophyton	ehrenbergi		98	Sarcophyton	ehrenbergi	100	Pulau Subar Laut	Big lagoon south seawall	20150705	short		MN690395
IP0041	Echinodermata	Echinoidea	Diadematoida	Diadematidae	Diadema	setosum								Pulau Subar Laut	Big lagoon centre seawall	20150705
IP0042	Mollusca	Gastropoda	Vetigastropoda	Trochidae	Trochus	maculatus	Trochus	maculatus	0	100	Trochus	maculatus	99.54	Pulau Subar Laut	Big lagoon centre seawall	20150705	long	ZRC.MOL.010687	MN690212
IP0043	Mollusca	Gastropoda	Pulmonata	Siphonariidae	Siphonaria		Siphonaria			98	Siphonaria		99.34	Pulau Subar Laut	Big lagoon north seawall	20150705	long		MN690211
IP0044	Mollusca	Gastropoda	Cycloneritimorpha	Neritidae	Nerita	undata								Pulau Subar Laut	Big lagoon south seawall	20150705
IP0045	Mollusca	Gastropoda	Cycloneritimorpha	Neritidae	Nerita	undata	Nerita	undata	0	100	Nerita	undata	99.63	Pulau Subar Laut	Big lagoon south seawall	20150705	short		MN689967
IP0046	Arthropoda	Malacostraca	Decapoda	Diogenidae	Diogenes		Eumunida	minor		87	Ebalia	affinis	87.62	Pulau Subar Laut	Big lagoon south seawall	20150705	long		MN690174
IP0047	Mollusca	Gastropoda	Neogastropoda	Muricidae	Reishia	bitubercularis	Thais	bitubercularis	0	100	Reishia	bitubercularis	100	Pulau Subar Laut	Big lagoon south seawall	20150705	long		MN689999
IP0048	Mollusca	Gastropoda	Neogastropoda	Muricidae	Drupella	margariticola	Ergalatax	margariticola	0	100	Drupella	margariticola	100	Pulau Subar Laut	Big lagoon south seawall	20150705	short		MN690180
IP0049	Mollusca	Bivalvia	Ostreida	Malleidae	Malleus	regula				NA	Atrina	fragilis	80.65	Pulau Subar Laut	Big lagoon north seawall	20150705	short	ZRC.MOL.010688	MN690596
IP0050	Arthropoda	Malacostraca	Decapoda	Diogenidae	Diogenes									Pulau Subar Laut	Big lagoon north seawall	20150705
IP0051	Mollusca	Bivalvia	Carditida	Carditidae	Cardita	variegata	Cardita	variegata	0	97	Cardita	variegata	94.91	Pulau Subar Laut	Big lagoon south seawall	20150705	long		MN690573
IP0052	Arthropoda	Arachnida	Araneae	Desidae	Desis	martensi	Octonoba	yesoensis	0	89	Eriovixia		90.63	Pulau Subar Laut	Big lagoon south seawall	20150705	long		MN690223
IP0053	Cnidaria	Hydrozoa	Leptothecata	Aglaopheniidae	Macrorhynchia		Plumularia	strictocarpa		84	Hydrozoa		86.42	Pulau Subar Darat SW	Reef 0 - 10m	20150825	long	ZRC.CNI.1243	MN690410
IP0054	Cnidaria	Hydrozoa	Leptothecata	Aglaopheniidae	Macrorhynchia		Praya	dubia		82	Leptothecata		99.24	Pulau Subar Darat SW	Reef 0 - 10m	20150825	long	ZRC.CNI.1244	MN690412
IP0055	Cnidaria	Anthozoa	Alcyonacea	Ellisellidae	Junceella		Junceella	fragilis		99	Dichotella	gemmacea	100	Pulau Subar Darat SW	Reef 0 - 10m	20150825	short	ZRC.CNI.1245	MN690404
IP0056	Cnidaria	Anthozoa	Alcyonacea	Ellisellidae	Junceella		Junceella	fragilis		99	Dichotella	gemmacea	100	Pulau Subar Darat SW	Reef 0 - 10m	20150825	long		MN690405
IP0057	Chordata	Ascidiacea	Phlebobranchia				Synoicum	castellatum		79	Synoicum	ostentor	80.06	Pulau Subar Darat SW	Reef 0 - 10m	20150825	short		MN690546
IP0058	Echinodermata	Crinoidea	Comatulida	Colobometridae	Oligometra	serripinna	Oligometra	serripinna	0	99	Echinodermata	Crinoidea	99.69	Pulau Subar Darat SW	Reef 0 - 10m	20150825	short	ZRC.ECH.1231	MN690225
IP0059	Echinodermata	Crinoidea	Comatulida	Colobometridae	Oligometra		Oligometra	serripinna		97	Crinoidea		96.97	Pulau Subar Darat SW	Reef 0 - 10m	20150825	long	ZRC.ECH.1232	MN690226
IP0060	Echinodermata	Crinoidea	Comatulida	Comatulidae	Comatula	purpurea								Pulau Subar Darat SW	Reef 0 - 10m	20150825
IP0061	Echinodermata	Crinoidea	Comatulida	Colobometridae	Oligometra		Oligometra	serripinna		98	Crinoidea		96.77	Pulau Subar Darat SW	Reef 0 - 10m	20150825	long	ZRC.ECH.1233	MN690231
IP0062	Mollusca	Gastropoda	Nudibranchia	Phyllidiidae	Phyllidia	varicosa	Phyllidia	varicosa	0	99	Nudibranchia		99.66	Pulau Subar Darat SW	Reef 0 - 10m	20150825	short	ZRC.MOL.010689	MN690287
IP0063	Mollusca	Gastropoda	Nudibranchia	Phyllidiidae	Phyllidiella	pustulosa	Phyllidiella	pustulosa	0	97	Phyllidiella	pustulosa	95.5	Pulau Subar Darat SW	Reef 0 - 10m	20150825	long	ZRC.MOL.010690	MN690285
IP0064	Mollusca	Gastropoda	Nudibranchia	Phyllidiidae										Pulau Subar Darat SW	Reef 0 - 10m	20150825
IP0065	Cnidaria	Anthozoa	Corallimorpharia	Discosomidae			Rhodactis			99	Discosoma		99.34	Pulau Subar Darat SW	Reef 0 - 10m	20150825	long		MN689968
IP0066	Echinodermata	Crinoidea	Comatulida	Himerometridae	Himerometra	robustipinna	Himerometra	robustipinna	0	98	Himerometra	robustipinna	98.05	Pulau Subar Darat SW	Reef 0 - 10m	20150825	long	ZRC.ECH.1234	MN690217
IP0067	Mollusca	Gastropoda	Nudibranchia	Chromodorididae	Doriprismatica	atromarginata	Doriprismatica	atromarginata	0	98	Doriprismatica	atromarginata	98.01	Pulau Subar Darat SW	Reef 0 - 10m	20150825	long	ZRC.MOL.010691	MN690234
IP0068	Mollusca	Gastropoda	Nudibranchia	Facelinidae	Pteraeolidia	ianthina	Pteraeolidia	ianthina	0	100	Pteraeolidia	ianthina	99.67	Pulau Subar Darat SW	Reef 0 - 10m	20150825	long	ZRC.MOL.010692	MN690309
IP0069	Platyhelminthes	Rhabditophora	Polycladida	Pseudocerotidae	Pseudoceros	concinnus								Pulau Subar Darat SW	Reef 0 - 10m	20150825		ZRC.PLA.0361
IP0070	Chordata	Ascidiacea	Stolidobranchia	Pyuridae			Herdmania	momus		99	Stolidobranchia		100	Pulau Subar Darat SW	Reef 0 - 10m	20150825	short		MN690553
IP0071	Cnidaria	Anthozoa	Alcyonacea	Alcyoniidae	Sarcophyton		Stereonephthya			99	Stereonephthya	cundabiluensis	99.85	Pulau Subar Darat SW	Reef 0 - 10m	20150825	long	ZRC.CNI.1246	MN690397
IP0072	Porifera	Demospongiae	Haplosclerida	Petrosiidae	Xestospongia	testudinaria	Xestospongia	testudinaria	0	99	Xestospongia	testudinaria	100	Pulau Subar Darat SW	Reef 0 - 10m	20150825	long	ZRC.POR. 0484	MN690392
IP0073	Annelida	Polychaeta	Phyllodocida	Syllidae			Xenosyllis	moloch		99	Xenosyllis	moloch	98.04	Pulau Subar Darat SW	Reef 0 - 10m	20150825	long	ZRC.ANN.0366	MN690495
IP0074	Arthropoda	Malacostraca	Tanaidacea				Eualus	amandae		79	Mesostigmata		78.47	Pulau Subar Darat SW	Reef 0 - 10m	20150825	short		MN690554
IP0075	Platyhelminthes	Rhabditophora	Polycladida	Pseudocerotidae	Maiazoon	orsaki								Pulau Subar Darat SW	Reef 0 - 10m	20150825
IP0076	Mollusca	Gastropoda	Nudibranchia	Facelinidae	Pteraeolidia	ianthina	Pteraeolidia	ianthina	0	100	Pteraeolidia	ianthina	93.94	Pulau Subar Darat SW	Reef 0 - 10m	20150825	short	ZRC.MOL.010693	MN690491
IP0077	Chordata	Ascidiacea	Aplousobranchia	Didemnidae			Lissoclinum	fragile		91	Lissoclinum	fragile	91.67	Pulau Subar Darat SW	Reef 0 - 10m	20150825	short		MN690551
IP0078	Arthropoda	Malacostraca	Isopoda				Tanytarsus	semibarbitarsus		79	Semomesia	croesus	79.04	Pulau Subar Darat SW	Reef 0 - 10m	20150825	long		MN690502
IP0079	Mollusca	Gastropoda	Nudibranchia	Flabellinidae	Coryphellina	rubrolineata	Tenellia	sibogae	0	90	Tenellia	sibogae	91.16	Pulau Subar Darat SW	Reef 0 - 10m	20150825	long	ZRC.MOL.010694	MN690324
IP0080	Platyhelminthes	Rhabditophora	Polycladida	Euryleptidae	Maritigrella	eschara								Pulau Subar Darat SW	Reef 0 - 10m	20150825
IP0081	Mollusca	Gastropoda	Nudibranchia	Phyllidiidae			Phyllidiopsis	fissurata		97	Sarostegia	oculata	78.7	Pulau Subar Darat SW	Reef 0 - 10m	20150825	long	ZRC.MOL.010695	MN690528
IP0082	Mollusca	Gastropoda	Nudibranchia	Phyllidiidae			Phyllidiopsis	fissurata		97	Phyllidiella	nigra	85.5	Pulau Subar Darat SW	Reef 0 - 10m	20150825	long	ZRC.MOL.010696	MN690282
IP0083	Ascoelomorpha	Acoelomorpha	Acoela				Sarcoptiformes			75	Acoelomorpha		81.41	Pulau Subar Darat SW	Reef 0 - 10m	20150825	short		MN690556
IP0084	Arthropoda	Malacostraca	Decapoda	Matutidae	Ashtoret	lunaris	Matuta	lunaris	0	91	Ashtoret	lunaris	98.96	Pulau Subar Laut	Big lagoon centre seawall	20150831	long	ZRC 2017.1112	MN689981
IP0085	Sipuncula						Phascolopsis	gouldii		81	Phascolopsis	gouldii	80.58	Pulau Subar Laut	Small lagoon centre seawall	20150831	long	ZRC.SIP.0030	MN690498
IP0086	Annelida	Polychaeta	Phyllodocida	Phyllodocidae			Pterocirrus	burtoni		81	Phyllodocidae		84.1	Pulau Subar Laut	Jetty	20150831	long	ZRC.ANN.0367	MN690235
IP0087	Cnidaria	Anthozoa	Actiniaria	Haloclavidae	Metapeachia	tropica	Urticina	eques		96	Peachia		96.83	Pulau Subar Laut	Big lagoon south seawall	20150831	long		MN690357
IP0088	Arthropoda	Malacostraca	Decapoda	Plagusiidae	Plagusia	immaculata	Plagusia	immaculata	0	99	Decapoda		99.69	Pulau Subar Laut	Small lagoon south seawall	20150831	long	ZRC 2017.1113	MN689984
IP0089	Arthropoda	Malacostraca	Decapoda	Diogenidae	Dardanus	megistos	Chionoecetes	japonicus	0	80	Dardanus	megistos	99.83	Pulau Subar Laut	Small lagoon seagrass patch	20150831	long		MN690006
IP0090	Annelida	Polychaeta	Sabellida	Terebellidae			Thelepus	cincinnatus		82	Terebellidae		87.23	Pulau Subar Laut	Big lagoon south seawall	20150831	short		MN690499
IP0091	Mollusca	Gastropoda	Pulmonata	Siphonariidae	Siphonaria	javanica	Siphonaria			100	Siphonaria		98.14	Pulau Subar Laut	Jetty	20150831	long	ZRC.MOL.010716	MN690503
IP0092	Mollusca	Gastropoda	Pulmonata	Siphonariidae	Siphonaria	javanica								Pulau Subar Laut	Jetty	20150831
IP0093	Mollusca	Gastropoda	Vetigastropoda	Trochidae	Trochus	maculatus	Trochus	maculatus	0	100	Trochus	maculatus	99.69	Pulau Subar Laut	Small lagoon centre seawall	20150831	long	ZRC.MOL.010755	MN690213
IP0094	Mollusca	Gastropoda	Neogastropoda	Muricidae	Reishia	bitubercularis	Thais	bitubercularis	0	100	Reishia	bitubercularis	100	Pulau Subar Laut	Jetty	20150831	long	ZRC.MOL.010697	MN690181
IP0095	Mollusca	Gastropoda	Neogastropoda	Muricidae	Reishia	clavigera	Reishia	clavigera	0	99	Reishia	clavigera	100	Pulau Subar Laut	Jetty	20150831	long		MN690182
IP0096	Mollusca	Gastropoda	Neogastropoda	Muricidae	Tenguella	musiva	Morula	musiva	0	98	Tenguella	musiva	99.38	Pulau Subar Laut	Jetty	20150831	long	ZRC.MOL.010698	MN690196
IP0097	Mollusca	Gastropoda	Neogastropoda	Muricidae	Tenguella	musiva	Morula	musiva	0	99	Tenguella	musiva	99.53	Pulau Subar Laut	Jetty	20150831	long	ZRC.MOL.010699	MN690197
IP0098	Mollusca	Gastropoda	Neogastropoda	Nassariidae	Nassarius	nodifer	Nassarius	hepaticus	1	99	Nassarius	nodifer	99.31	Pulau Subar Laut	Jetty	20150831	long	ZRC.MOL.010700	MN690186
IP0099	Mollusca	Gastropoda	Cycloneritimorpha	Neritidae	Nerita	histrio	Nerita	histrio	0	99	Nerita	histrio	99.69	Pulau Subar Laut	Jetty	20150831	short	ZRC.MOL.010701	MN690177
IP0100	Mollusca	Gastropoda	Cycloneritimorpha	Neritidae	Nerita	chamaeleon	Nerita	chamaeleon	0	99	Cycloneritimorpha		100	Pulau Subar Laut	Jetty	20150831	long	ZRC.MOL.010702	MN690176
IP0101	Mollusca	Gastropoda	Neogastropoda	Columbellidae	Pictocolumbella	ocellata								Pulau Subar Laut	Jetty	20150831		ZRC.MOL.010703
IP0102	Mollusca	Gastropoda	Neogastropoda	Columbellidae	Pictocolumbella	ocellata	Mitrella	bicincta	0	88	Gastropoda		93.48	Pulau Subar Laut	Jetty	20150831	long		MN690188
IP0103	Mollusca	Gastropoda	Neogastropoda	Columbellidae	Pictocolumbella	ocellata								Pulau Subar Laut	Jetty	20150831
IP0104	Mollusca	Gastropoda	Littorinimorpha	Strombidae	Canarium	urceus								Pulau Subar Laut	Jetty	20150831
IP0105	Mollusca	Bivalvia	Ostreida	Pinnidae			Pinna	atropurpurea		95	Pinna	atropurpurea	83.26	Pulau Subar Laut	Big lagoon north seawall	20150831	short		MN690559
IP0106	Arthropoda	Hexanauplia	Sessilia	Tetraclitidae	Tetraclita	squamosa	Tetraclita	squamosa	0	99	Tetraclita	squamosa	99.67	Pulau Subar Laut	Jetty	20150831	short	ZRC 2017.1114	MN690051
IP0107	Mollusca	Bivalvia	Ostreida	Ostreidae										Pulau Subar Laut	Jetty	20150831
IP0108	Nemertea						Nemertopsis	tetraclitophila		86	Prosorhochmus	nelsoni	86.64	Pulau Subar Laut	Jetty	20150831	long	ZRC.MIS.0006	MN690179
IP0109	Nemertea						Nemertopsis			93	Nemertopsis		93.65	Pulau Subar Laut	Jetty	20150831	short		MN690191
IP0110	Arthropoda	Malacostraca	Decapoda											Pulau Subar Laut	Small lagoon north seawall	20150831
IP0111	Arthropoda	Malacostraca	Decapoda				Caridea			84	Decapoda		94.61	Pulau Subar Laut	Small lagoon north seawall	20150831	short		MN690026
IP0112	Arthropoda	Hexanauplia	Sessilia	Tetraclitidae	Tetraclita	singaporensis	Tetraclita	singaporensis	0	100	Tetraclita	singaporensis	99.68	Pulau Subar Laut	Jetty	20150831	short		MN690052
IP0113	Arthropoda	Hexanauplia	Sessilia	Tetraclitidae	Tetraclita	singaporensis	Tetraclita	singaporensis	0	100	Tetraclita	singaporensis	99.54	Pulau Subar Laut	Jetty	20150831	long		MN690054
IP0114	Arthropoda	Malacostraca	Decapoda	Alpheidae	Alpheus		Caridea			84	Alpheus		95.85	Tanjong Hakim	West side rocky shore	20150929	long	ZRC 2017.1115	MN690010
IP0115	Mollusca	Cephalopoda	Decapodiformes	Idiosepiidae	Idiosepius	pygmaeus	Idiosepius	pygmaeus	0	99	Idiosepius	pygmaeus	99.84	Tanjong Hakim	West side rocky shore	20150929	long	ZRC.MOL.010704	MN690168
IP0116	Arthropoda	Malacostraca	Decapoda				Caridea			84	Alpheus	strenuus	88.84	Tanjong Hakim	West side rocky shore	20150929	long	ZRC 2017.1116	MN690013
IP0117	Mollusca	Cephalopoda	Decapodiformes	Idiosepiidae	Idiosepius	pygmaeus	Idiosepius	pygmaeus	0	99	Idiosepius	pygmaeus	99.07	Tanjong Hakim	West side rocky shore	20150929	short	ZRC.MOL.010705	MN690169
IP0118	Cnidaria	Scyphozoa	Semaeostomeae	Pelagiidae										Tanjong Hakim	West side rocky shore	20150929
IP0119	Cnidaria	Scyphozoa	Semaeostomeae	Pelagiidae			Montastraea	magnistellata		100	Favites	complanata	100	Tanjong Hakim	West side rocky shore	20150929	long		MN690379
IP0120	Cnidaria	Scyphozoa	Semaeostomeae	Pelagiidae										Tanjong Hakim	West side rocky shore	20150929
IP0121	Cnidaria	Anthozoa	Actiniaria	Phymanthidae	Phymanthus		Anthopleura	elegantissima		98	Actiniaria		99.69	Tanjong Hakim	West side rocky shore	20150929	long	ZRC.CNI.1248	MN690358
IP0122	Cnidaria	Anthozoa	Actiniaria	Phymanthidae	Phymanthus		Anthopleura	elegantissima		99	Actiniaria		99.69	Tanjong Hakim	West side rocky shore	20150929	short	ZRC.CNI.1249	MN690365
IP0123	Arthropoda	Malacostraca	Decapoda	Porcellanidae										Tanjong Hakim	West side rocky shore	20150929
IP0124	Arthropoda	Malacostraca	Decapoda	Porcellanidae			Eumunida	sternomaculata		87	Decapoda		97.15	Tanjong Hakim	West side rocky shore	20150929	long		MN690000
IP0125	Arthropoda	Insecta	Hemiptera	Gerridae	Halobates	hayanus	Perittopus	horvathi	0	90	Halobates		93.66	Tanjong Hakim	West side rocky shore	20150929	long		MN690240
IP0126	Arthropoda	Malacostraca	Decapoda	Pilumnidae			Xanthidae			89	Pilumnus	vespertilio	99.4	Tanjong Hakim	West side rocky shore	20150929	long		MN689978
IP0127	Annelida	Polychaeta	Sabellida	Terebellidae			Thelepus	cincinnatus		84	Terebellidae		90.22	Tanjong Hakim	West side rocky shore	20150929	long		MN690500
IP0128	Mollusca	Gastropoda	Trochoidea	Turbinidae	Turbo		Turbo			99	Turbo		100	Tanjong Hakim	West side rocky shore	20150929	short		MN690189
IP0129	Mollusca	Gastropoda	Trochoidea	Turbinidae	Turbo	bruneus	Turbo	bruneus	0	99	Turbo	bruneus	99.69	Tanjong Hakim	West side rocky shore	20150929	long		MN690190
IP0130	Echinodermata	Ophiuroidea	Ophiurida	Ophiactidae	Ophiactis	savignyi	Ophiactis	savignyi	0	97	Ophiactis	savignyi	99.24	Tanjong Hakim	West side rocky shore	20150929	long	ZRC.ECH.1235	MN690259
IP0131	Echinodermata	Ophiuroidea	Ophiurida	Ophiactidae	Ophiactis									Tanjong Hakim	West side rocky shore	20150929
IP0132	Annelida	Polychaeta	Phyllodocida	Hesionidae	Leocrates		Perinereis	gualpensis		81	Hesione	panamena	83.33	Tanjong Hakim	West side rocky shore	20150929	long		MN690215
IP0133	Annelida	Polychaeta	Amphinomida	Amphinomidae	Eurythoe									Tanjong Hakim	West side rocky shore	20150929
IP0134	Annelida	Polychaeta	Sabellida	Terebellidae										Tanjong Hakim	West side rocky shore	20150929
IP0135	Annelida	Polychaeta	Sabellida	Terebellidae			Thelepus	cincinnatus		83	Terebellidae		87.62	Tanjong Hakim	West side rocky shore	20150929	short		MN690501
IP0136	Mollusca	Gastropoda	Systellommatophora	Onchidiidae	Peronia	Singapore clade	Peronia	verruculata		95	Peronia		95.53	Tanjong Hakim	West side rocky shore	20150929	long	ZRC.MOL.010706	MN690327
IP0137	Arthropoda	Malacostraca					Sternomoera	japonica		83	Eusiridae		83.73	Tanjong Hakim	West side rocky shore	20150929	long		MN690043
IP0138	Arthropoda	Malacostraca	Decapoda				Munida	proto		82	Tozeuma		83.66	Tanjong Hakim	West side rocky shore	20150929	long		MN690035
IP0139	Mollusca	Cephalopoda	Octopoda	Octopodidae			Octopus	vulgaris		91	Octopus	tetricus	91.67	Pulau Subar Laut	Big lagoon	20150930	short		MN690167
IP0140	Arthropoda	Malacostraca	Decapoda	Coenobitidae	Coenobita		Ciliopagurus	strigatus		83	Coenobita	lila	99.82	Pulau Subar Laut	Big lagoon	20150930	long		MN690249
IP0141	Echinodermata	Echinoidea	Diadematoida	Diadematidae	Diadema	setosum	Diadema	setosum	0	99	Diadema	setosum	98.82	Pulau Subar Laut	Big lagoon	20150930	long		MN690257
IP0142	Echinodermata	Holothuroidea	Apodida	Synaptidae										Pulau Subar Laut	Big lagoon	20150930
IP0143	Arthropoda	Arachnida	Araneae	Desidae	Desis	martensi	Cheiracanthium	mildei	0	91	Homalonychus	theologus	91.19	Pulau Subar Laut	Big lagoon	20150930	short		MN690224
IP0144	Mollusca	Gastropoda												Pulau Subar Laut	Big lagoon	20150930
IP0145	Arthropoda	Malacostraca	Decapoda	Ocypodidae	Ocypode	ceratophthalmus	Ocypode	ceratophthalmus	0	100	Decapoda		99.85	Pulau Subar Laut	Big lagoon	20150930	long	ZRC 2017.1117	MN689985
IP0146	Arthropoda	Malacostraca	Decapoda	Ocypodidae	Ocypode	ceratophthalmus								Pulau Subar Laut	Big lagoon	20150930
IP0147	Annelida	Polychaeta	Eunicida	Eunicidae	Eunice	aphroditois	Palola			82	Palola	viridis	82.68	Pulau Subar Laut	Big lagoon	20150930	long	ZRC.ANN.0368	MN690243
IP0148	Echinodermata	Ophiuroidea	Ophiurida	Ophiactidae			Macrophiothrix	caenosa		92	Macrophiothrix		92.91	Pulau Subar Laut	Big lagoon	20150930	short		MN690278
IP0149	Arthropoda	Malacostraca	Decapoda				Charybdis	anisodon		85	Portunus	rubromarginatus	89.23	Pulau Subar Laut	Big lagoon	20150930	long		MN690040
IP0150	Arthropoda	Malacostraca	Decapoda				Caridea			85	Alpheus	edwardsii	95.25	Pulau Subar Laut	Big lagoon	20150930	long		MN690015
IP0151	Arthropoda	Malacostraca	Decapoda				Brachyura			89	Pilumnus	vespertilio	99.54	Pulau Subar Laut	Big lagoon	20150930	long		MN689979
IP0152	Arthropoda	Malacostraca	Decapoda	Alpheidae			Caridea			85	Alpheus	strenuus	88.69	Pulau Subar Laut	Big lagoon	20150930	long		MN690014
IP0153	Annelida	Polychaeta	Sabellida	Terebellidae	Thelepus									Pulau Subar Laut	Big lagoon	20150930
IP0154	Mollusca	Bivalvia	Imparidentia	Galeommatidae			Galeomma			81	Galeommatidae		81.61	Pulau Subar Laut	Big lagoon	20150930	long		MN690523
IP0155	Mollusca	Bivalvia	Imparidentia	Galeommatidae			Galeomma			81	Galeommatidae		81.77	Pulau Subar Laut	Big lagoon	20150930	long	ZRC.MOL.010758	MN690524
IP0156	Annelida	Polychaeta	Phyllodocida	Polynoidae	Lepidonotus									Pulau Subar Laut	Big lagoon	20150930
IP0157	Annelida	Polychaeta	Amphinomida	Amphinomidae	Eurythoe									Pulau Subar Laut	Big lagoon	20150930
IP0158	Annelida	Polychaeta	Amphinomida	Amphinomidae	Eurythoe		Eurythoe	cf. complanata		98	Eurythoe	complanata	98.61	Pulau Subar Laut	Big lagoon	20150930	long		MN690244
IP0159	Annelida	Polychaeta	Amphinomida	Amphinomidae	Eurythoe		Eurythoe	cf. complanata		98	Eurythoe	complanata	98.46	Pulau Subar Laut	Big lagoon	20150930	long	ZRC.ANN.0369	MN690245
IP0160	Nemertea						Cerebratulus	leucopsis		90	Dendrorhynchus	sinensis	87.68	Pulau Subar Laut	Big lagoon	20150930	long	ZRC.MIS.0007	MN690210
IP0161	Arthropoda	Ostracoda												Pulau Subar Laut	Big lagoon	20150930
IP0162	Annelida	Polychaeta												Pulau Subar Laut	Big lagoon	20150930
IP0163	Platyhelminthes	Rhabditophora	Polycladida	Pseudocerotidae	Pseudoceros	hancockanus								Pulau Subar Laut SE	Reef 0 - 12m	20151026
IP0164	Platyhelminthes	Rhabditophora	Polycladida	Pseudocerotidae	Pseudoceros	hancockanus								Pulau Subar Laut SE	Reef 0 - 12m	20151026
IP0165	Mollusca	Gastropoda	Sacoglossa	Plakobranchidae	Elysia	ornata								Pulau Subar Laut SE	Reef 0 - 12m	20151026
IP0166	Platyhelminthes	Rhabditophora	Polycladida	Pseudocerotidae	Pseudobiceros	fulgor								Pulau Subar Laut SE	Reef 0 - 12m	20151026
IP0167	Ascoelomorpha	Acoelomorpha	Acoela				Amphiscolops	bermudensis		77	Acoelomorpha		79.29	Pulau Subar Laut SE	Reef 0 - 12m	20151026	long		MN690557
IP0168	Echinodermata	Holothuroidea	Apodida	Synaptidae										Pulau Subar Laut SE	Reef 0 - 12m	20151026		ZRC.ECH.1236
IP0169	Mollusca	Gastropoda	Sacoglossa	Plakobranchidae	Thuridilla		Thuridilla	gracilis		98	Thuridilla	gracilis	99.56	Pulau Subar Laut SE	Reef 0 - 12m	20151026	long		MN690315
IP0170	Echinodermata	Holothuroidea	Apodida	Synaptidae										Pulau Subar Laut SE	Reef 0 - 12m	20151026
IP0171	Echinodermata	Holothuroidea	Apodida	Synaptidae			Eleutherozoa			81	Synaptula	reticulata	99.6	Pulau Subar Laut SE	Reef 0 - 12m	20151026	long		MN689973
IP0172	Mollusca	Gastropoda	Nudibranchia	Chromodorididae	Hypselodoris	emma	Hypselodoris	emma	0	99	Gastropoda		89.76	Pulau Subar Laut SE	Reef 0 - 12m	20151026	long	ZRC.MOL.010707	MN690292
IP0173	Mollusca	Gastropoda	Nudibranchia	Chromodorididae	Hypselodoris		Hypselodoris	reidi		91	Hypselodoris	regina	94.15	Pulau Subar Laut SE	Reef 0 - 12m	20151026	long		MN690293
IP0174	Mollusca	Gastropoda	Nudibranchia	Chromodorididae	Goniobranchus	fidelis	Goniobranchus	fidelis	0	99	Goniobranchus	heatherae	87	Pulau Subar Laut SE	Reef 0 - 12m	20151026	long	ZRC.MOL.010708	MN690312
IP0175	Annelida	Polychaeta	Sabellida	Serpulidae	Protula		Brachidontes	adamsianus		81	Sarostegia	oculata	74.17	Pulau Subar Laut SE	Reef 0 - 12m	20151026	short		MN690576
IP0176	Annelida	Polychaeta	Sabellida	Sabellidae	Sabellastarte	indica	Sabellastarte			93	Sabellastarte		94.7	Pulau Subar Laut SE	Reef 0 - 12m	20151026	long		MN690494
IP0177	Mollusca	Gastropoda	Nudibranchia	Bornellidae	Bornella	stellifera	Bornella	anguilla	0	87	Caloria	indica	83.49	Pulau Subar Laut SE	Reef 0 - 12m	20151026	long		MN690301
IP0178	Mollusca	Gastropoda	Nudibranchia	Aegiridae	Notodoris	gardineri	Notodoris	gardineri	0	100	Notodoris	gardineri	100	Pulau Subar Laut SE	Reef 0 - 12m	20151026	long		MN690302
IP0179	Mollusca	Gastropoda	Nudibranchia	Aegiridae	Notodoris	gardineri								Pulau Subar Laut SE	Reef 0 - 12m	20151026
IP0180	Platyhelminthes	Rhabditophora	Polycladida	Pseudocerotidae	Pseudobiceros	stellae	Platyhelminthes			84	Turbellaria		81.05	Pulau Subar Laut SE	Reef 0 - 12m	20151026	short		MN690532
IP0181	Cnidaria	Anthozoa	Alcyonacea	Alcyoniidae	Sarcophyton		Chironephthya	mediterranea		99	Siphonogorgia		99.69	Pulau Subar Laut SE	Reef 0 - 12m	20151026	short	ZRC.CNI.1250	MN690396
IP0182	Mollusca	Gastropoda	Littorinimorpha	Ovulidae	Dentiovula		Dentiovula	takeoi		99	Crenavolva	tinctura	99.66	Pulau Subar Laut SE	Reef 0 - 12m	20151026	long	ZRC.MOL.010709	MN690246
IP0183	Mollusca	Gastropoda	Littorinimorpha	Cypraeidae			Vexillum			79	Fluminicola	ahjumawi	79.54	Pulau Subar Laut SE	Reef 0 - 12m	20151026	long		MN690247
IP0184	Echinodermata	Ophiuroidea	Ophiurida	Ophiactidae	Ophiactis									Pulau Subar Laut SE	Reef 0 - 12m	20151026
IP0185	Mollusca	Bivalvia	Limida	Limidae	Lima	vulgaris	Lima	lima	0	85	Lima	lima	79.84	Pulau Subar Laut SE	Reef 0 - 12m	20151026	long	ZRC.MOL.010710	MN690570
IP0186	Mollusca	Bivalvia	Ostreida	Pteriidae	Isognomon	isognomum	Pinctada	maxima	0	81	Limax		74.49	Pulau Subar Laut SE	Reef 0 - 12m	20151026	short	ZRC.MOL.010711	MN690578
IP0187	Echinodermata	Asteroidea	Valvatida	Asterinidae	Nepanthia		Patiriella	exigua		84	Echinaster		85.32	Pulau Subar Laut SE	Reef 0 - 12m	20151026	long	ZRC.ECH.1237	MN690255
IP0188	Mollusca	Gastropoda	Nudibranchia	Facelinidae	Pteraeolidia	ianthina	Pteraeolidia	ianthina	0	98	Pteraeolidia	ianthina	96.88	Pulau Subar Laut SE	Reef 0 - 12m	20151026	long		MN690490
IP0189	Mollusca	Gastropoda	Nudibranchia	Facelinidae	Pteraeolidia	ianthina	Pteraeolidia	ianthina	0	99	Pteraeolidia	ianthina	99.18	Pulau Subar Laut SE	Reef 0 - 12m	20151026	long		MN690488
IP0190	Annelida	Polychaeta	Phyllodocida	Polynoidae			Polynoidae			87	Polynoidae		86.83	Pulau Subar Laut SE	Reef 0 - 12m	20151026	long		MN690218
IP0191	Mollusca	Gastropoda	Nudibranchia	Phyllidiidae	Phyllidia	ocellata	Phyllidia	ocellata	0	99	Phyllidia	ocellata	99	Pulau Subar Laut SE	Reef 0 - 12m	20151026	long	ZRC.MOL.010712	MN690290
IP0192	Mollusca	Gastropoda	Nudibranchia	Phyllidiidae	Phyllidia	ocellata								Pulau Subar Laut SE	Reef 0 - 12m	20151026
IP0193	Echinodermata	Ophiuroidea	Ophiurida	Ophiactidae										Pulau Subar Laut SE	Reef 0 - 12m	20151026		ZRC.ECH.1238
IP0194	Echinodermata	Ophiuroidea	Euryalida	Euryalidae			Euryale	aspera		95	Euryale	asperum	95.61	Pulau Subar Laut SE	Reef 0 - 12m	20151026	long		MN690261
IP0195	Mollusca	Gastropoda	Neogastropoda	Muricidae	Mancinella	echinata	Mancinella	echinata	0	99	Mancinella	echinata	99.08	Pulau Subar Laut SE	Reef 0 - 12m	20151026	long	ZRC.MOL.010713	MN690183
IP0196	Mollusca	Gastropoda	Neogastropoda	Muricidae	Mancinella	echinata								Pulau Subar Laut SE	Reef 0 - 12m	20151026
IP0197	Cnidaria	Anthozoa	Scleractinia	Lobophylliidae	Echinophyllia	aspera								Pulau Subar Laut SE	Reef 0 - 12m	20151026
IP0198	Cnidaria	Anthozoa	Alcyonacea	Gorgoniidae			Leptogorgia	cuspidata		97	Paraplexaura		99.85	Pulau Subar Laut SE	Reef 0 - 12m	20151026	long		MN690400
IP0199	Echinodermata	Crinoidea	Comatulida	Colobometridae	Oligometra		Oligometra	serripinna		97	Crinoidea		96.23	Pulau Subar Laut SE	Reef 0 - 12m	20151026	long	ZRC.ECH.1239	MN690230
IP0200	Echinodermata	Crinoidea	Comatulida	Colobometridae	Oligometra		Oligometra	serripinna		97	Crinoidea		96.23	Pulau Subar Laut SE	Reef 0 - 12m	20151026	long	ZRC.ECH.1240	MN690228
IP0201	Echinodermata	Crinoidea	Comatulida	Colobometridae	Oligometra		Oligometra	serripinna		98	Crinoidea		98.95	Pulau Subar Laut SE	Reef 0 - 12m	20151026	long		MN690229
IP0202	Echinodermata	Crinoidea	Comatulida	Colobometridae	Oligometra		Oligometra	serripinna		97	Crinoidea		96.44	Pulau Subar Laut SE	Reef 0 - 12m	20151026	long	ZRC.ECH.1241	MN690227
IP0203	Echinodermata	Crinoidea	Comatulida	Colobometridae	Oligometra		Oligometra	serripinna		96	Crinoidea		96.97	Pulau Subar Laut SE	Reef 0 - 12m	20151026	long	ZRC.ECH.1242	MN690233
IP0204	Echinodermata	Crinoidea	Comatulida	Colobometridae	Oligometra		Oligometra	serripinna		98	Crinoidea		98.95	Pulau Subar Laut SE	Reef 0 - 12m	20151026	long		MN690232
IP0205	Echinodermata	Crinoidea	Comatulida	Colobometridae	Oligometra									Pulau Subar Laut SE	Reef 0 - 12m	20151026
IP0206	Annelida	Polychaeta	Phyllodocida	Polynoidae	Paradyte	crinoidicola								Pulau Subar Laut SE	Reef 0 - 12m	20151026
IP0207	Echinodermata	Ophiuroidea	Ophiurida	Ophiactidae	Ophiactis		Ophiactis	savignyi		97	Ophiuroidea		99.39	Pulau Subar Laut SE	Reef 0 - 12m	20151026	long	ZRC.ECH.1243	MN690260
IP0208	Echinodermata	Ophiuroidea	Ophiurida	Ophiotrichidae	Ophiothela									Pulau Subar Laut SE	Reef 0 - 12m	20151026
IP0209	Cnidaria	Hydrozoa	Anthoathecata	Stylasteridae			Turritopsis	rubra		83	Hydrozoa		82.95	Pulau Subar Laut SE	Reef 0 - 12m	20151026	long	ZRC.CNI.1251	MN690411
IP0210	Cnidaria	Anthozoa	Alcyonacea	Ellisellidae			Leptogorgia	cuspidata		97	Menella		100	Pulau Subar Laut SE	Reef 0 - 12m	20151026	long		MN690402
IP0211	Annelida	Polychaeta	Phyllodocida	Polynoidae			Harmothoe			86	Eunoe	nodosa	86.08	Pulau Subar Laut SE	Reef 0 - 12m	20151026	long		MN690219
IP0212	Arthropoda	Malacostraca	Amphipoda				Ampithoe	rubricata		87	Ischyroceridae		87.06	Pulau Subar Laut SE	Reef 0 - 12m	20151026	short		MN690332
IP0213	Arthropoda	Malacostraca	Amphipoda				Aora	typica		82	Aora	typica	83.23	Pulau Subar Laut SE	Reef 0 - 12m	20151026	long		MN690251
IP0214	Arthropoda	Malacostraca	Amphipoda				Amphipoda			97	Amphipoda		97.25	Pulau Subar Laut SE	Reef 0 - 12m	20151026	long		MN690041
IP0215	Echinodermata	Ophiuroidea	Ophiurida	Ophiotrichidae	Ophiothela									Pulau Subar Laut SE	Reef 0 - 12m	20151026
IP0216	Echinodermata	Ophiuroidea	Ophiurida	Ophiotrichidae	Ophiothela		Ophiothela	danae		98	Ophiothela	danae	98.8	Pulau Subar Laut SE	Reef 0 - 12m	20151026	long	ZRC.ECH.1244	MN690265
IP0217	Echinodermata	Ophiuroidea	Ophiurida	Ophiotrichidae			Euryale	aspera		96	Euryale	asperum	95.63	Pulau Subar Laut SE	Reef 0 - 12m	20151026	long	ZRC.ECH.1245	MN690262
IP0218	Echinodermata	Ophiuroidea	Ophiurida	Ophiotrichidae	Ophiothela		Ophiothela	vincula		99	Ophiothela	danae	99.49	Pulau Subar Laut SE	Reef 0 - 12m	20151026	long		MN690266
IP0219	Echinodermata	Ophiuroidea	Ophiurida	Ophiotrichidae	Ophiothela		Ophiothela	vincula		99	Ophiuroidea		98.55	Pulau Subar Laut SE	Reef 0 - 12m	20151026	long		MN690276
IP0220	Echinodermata	Ophiuroidea	Ophiurida	Ophiotrichidae	Ophiothela		Ophiothela	vincula		99	Ophiothela	danae	98.63	Pulau Subar Laut SE	Reef 0 - 12m	20151026	long		MN690269
IP0221	Echinodermata	Ophiuroidea	Ophiurida	Ophiotrichidae	Ophiothela		Ophiothela	danae		98	Ophiothela	danae	98.8	Pulau Subar Laut SE	Reef 0 - 12m	20151026	long		MN690267
IP0222	Echinodermata	Ophiuroidea	Ophiurida	Ophiotrichidae	Ophiothela									Pulau Subar Laut SE	Reef 0 - 12m	20151026
IP0223	Echinodermata	Ophiuroidea	Ophiurida	Ophiotrichidae	Ophiothela		Ophiothela	vincula		99	Ophiothela	danae	98.63	Pulau Subar Laut SE	Reef 0 - 12m	20151026	long		MN690272
IP0224	Echinodermata	Ophiuroidea	Ophiurida	Ophiotrichidae			Euryale	aspera		95	Euryale	asperum	95.45	Pulau Subar Laut SE	Reef 0 - 12m	20151026	long	ZRC.ECH.1246	MN690263
IP0225	Echinodermata	Ophiuroidea	Ophiurida	Ophiotrichidae	Ophiothela		Ophiothela	vincula		98	Ophiothela	danae	99.32	Pulau Subar Laut SE	Reef 0 - 12m	20151026	long		MN690268
IP0226	Echinodermata	Ophiuroidea	Ophiurida	Ophiotrichidae	Ophiothela		Ophiothela	vincula		99	Ophiothela	danae	98.63	Pulau Subar Laut SE	Reef 0 - 12m	20151026	long		MN690270
IP0227	Echinodermata	Ophiuroidea	Ophiurida	Ophiotrichidae	Ophiothela		Ophiothela	danae		97	Ophiuroidea		98.91	Pulau Subar Laut SE	Reef 0 - 12m	20151026	short		MN690277
IP0228	Echinodermata	Ophiuroidea	Ophiurida	Ophiotrichidae	Ophiothela		Ophiothela	vincula		99	Ophiothela	danae	98.46	Pulau Subar Laut SE	Reef 0 - 12m	20151026	long		MN690273
IP0229	Echinodermata	Ophiuroidea	Ophiurida	Ophiotrichidae	Ophiothela		Ophiothela	danae		98	Ophiothela	danae	98.8	Pulau Subar Laut SE	Reef 0 - 12m	20151026	long		MN690271
IP0230	Echinodermata	Ophiuroidea	Ophiurida	Ophiotrichidae	Ophiothela		Ophiothela	danae		98	Ophiothela	danae	98.97	Pulau Subar Laut SE	Reef 0 - 12m	20151026	long	ZRC.ECH.1247	MN690274
IP0231	Echinodermata	Ophiuroidea	Ophiurida	Ophiotrichidae	Ophiothela		Ophiothela	vincula		98	Ophiothela	danae	99.29	Pulau Subar Laut SE	Reef 0 - 12m	20151026	long	ZRC.ECH.1248	MN690275
IP0232	Echinodermata	Ophiuroidea	Ophiurida	Ophiotrichidae	Ophiothela		Colletes			74	Annelida		78.53	Pulau Subar Laut SE	Reef 0 - 12m	20151026	long		MN690558
IP0233	Kinorhyncha													Pulau Subar Laut SE	Reef 0 - 12m	20151026
IP0234	Kinorhyncha													Pulau Subar Laut SE	Reef 0 - 12m	20151026
IP0235	Arthropoda													Pulau Subar Laut SE	Reef 0 - 12m	20151026
IP0236	Kinorhyncha													Pulau Subar Laut SE	Reef 0 - 12m	20151026
IP0237	Arthropoda	Hexanauplia	Copepoda				Cyclopoida			79	Arthropoda		87.5	Pulau Subar Laut SE	Reef 0 - 12m	20151026	short		MN690161
IP0238	Kinorhyncha													Pulau Subar Laut SE	Reef 0 - 12m	20151026
IP0239	Kinorhyncha													Pulau Subar Laut SE	Reef 0 - 12m	20151026
IP0240	Mollusca	Cephalopoda	Octopoda	Octopodidae			Octopus	vitiensis		98	Octopus	oliveri	89.76	Tanjong Hakim	West side rocky shore	20151029	long		MN690165
IP0241	Arthropoda	Malacostraca	Decapoda	Diogenidae	Dardanus	lagopodes	Dardanus	lagopodes	0	100	Decapoda		99.53	Tanjong Hakim	West side rocky shore	20151029	long		MN690007
IP0242	Mollusca	Gastropoda	Littorinimorpha	Naticidae	Polinices	mammilla	Naticarius	hebraeus	0	90	Gastropoda		92.53	Tanjong Hakim	West side rocky shore	20151029	long	ZRC.MOL.010714	MN690187
IP0243	Platyhelminthes	Rhabditophora	Polycladida	Pseudocerotidae	Pseudobiceros	stellae	Platyhelminthes			84	Turbellaria		81.99	Tanjong Hakim	West side rocky shore	20151029	short		MN690533
IP0244	Echinodermata	Holothuroidea	Apodida	Synaptidae			Eleutherozoa			81	Synaptula	reticulata	99.6	Tanjong Hakim	West side rocky shore	20151029	long		MN689974
IP0245	Arthropoda	Malacostraca	Decapoda	Grapsidae	Metopograpsus		Metopograpsus			87	Metopograpsus	oceanicus	99.69	Tanjong Hakim	West side rocky shore	20151029	long	ZRC 2017.1118	MN689983
IP0246	Arthropoda	Malacostraca	Decapoda	Hippolytidae			Blepharipoda	occidentalis		83	Hippolyte	obliquimanus	85.14	Tanjong Hakim	West side rocky shore	20151029	short		MN690036
IP0247	Annelida	Polychaeta	Phyllodocida	Syllidae			Opisthosyllis	leslieharrisae		84	Opisthosyllis	leslieharrisae	82.84	Tanjong Hakim	West side rocky shore	20151029	long	ZRC.ANN.0370	MN690496
IP0248	Annelida	Polychaeta	Phyllodocida	Syllidae			Syllis	gracilis		81	Syllidae		82.96	Tanjong Hakim	West side rocky shore	20151029	short	ZRC.ANN.0371	MN690497
IP0249	Mollusca	Bivalvia	Imparidentia	Galeommatidae			Galeomma			81	Galeommatidae		81.7	Tanjong Hakim	West side rocky shore	20151029	long	ZRC.MOL.010715	MN690525
IP0250	Mollusca	Bivalvia	Imparidentia	Galeommatidae			Galeomma			81	Galeommatidae		79.31	Tanjong Hakim	West side rocky shore	20151029	long		MN690526
IP0251	Mollusca	Gastropoda	Littorinimorpha	Cypraeidae	Erronea	ovum								Tanjong Hakim	West side rocky shore	20151029
IP0252	Echinodermata	Holothuroidea	Aspidochirotida	Holothuriidae	Holothuria	pardalis	Holothuria	leucospilota	0	84	Aspidochirotida		99.84	Tanjong Hakim	West side rocky shore	20151029	long	ZRC.ECH.1249	MN690258
IP0253	Arthropoda	Malacostraca	Decapoda	Macrophthalmidae			Chaenostoma	boscii		99	Chaenostoma	boscii	99.69	Tanjong Hakim	West side rocky shore	20151029	long		MN690001
IP0254	Arthropoda	Malacostraca	Decapoda	Diogenidae			Clibanarius	englaucus		90	Clibanarius	merguiensis	90.67	Tanjong Hakim	West side rocky shore	20151029	long		MN690004
IP0255	Arthropoda	Malacostraca	Decapoda				Macromedaeus	distinguendus		88	Decapoda		89.37	Tanjong Hakim	West side rocky shore	20151029	long		MN689990
IP0256	Arthropoda	Malacostraca	Decapoda	Menippidae	Myomenippe	hardwickii	Macromedaeus	distinguendus	0	88	Decapoda		89.37	Tanjong Hakim	West side rocky shore	20151029	long		MN689991
IP0257	Arthropoda	Malacostraca	Decapoda				Neoxanthops	lineatus		88	Neoxanthops	lineatus	87.64	Tanjong Hakim	West side rocky shore	20151029	short		MN689989
IP0258	Arthropoda	Malacostraca	Decapoda				Neoxanthops	lineatus		88	Neoxanthops	lineatus	87.94	Tanjong Hakim	West side rocky shore	20151029	short		MN689988
IP0259	Mollusca	Gastropoda	Neogastropoda	Muricidae	Chicoreus		Chicoreus	brunneus		99	Chicoreus	brunneus	98.17	Tanjong Hakim	West side rocky shore	20151029	long		MN690178
IP0260	Mollusca	Bivalvia	Arcida	Arcidae	Barbatia		Barbatia	decussata		99	Arcida		98.14	Pulau Subar Darat	South lagoon	20151030	long	ZRC.MOL.010717	MN690565
IP0261	Arthropoda	Malacostraca	Decapoda				Caridea			82	Lysmata		92.63	Pulau Subar Darat	South lagoon	20151030	long		MN690017
IP0262	Arthropoda	Malacostraca	Decapoda				Synalpheus	neptunus		81	Lysmata		92.78	Pulau Subar Darat	South lagoon	20151030	long	ZRC 2017.1119	MN690018
IP0263	Mollusca	Bivalvia	Limida	Limidae	Limaria	fragilis	Limaria			100	Limaria	hirasei	80.72	Pulau Subar Darat	South lagoon	20151030	long	ZRC.MOL.010718	MN690571
IP0264	Arthropoda	Malacostraca	Decapoda				Uca	formosensis		82	Lucilia	silvarum	92.49	Pulau Subar Darat	South lagoon	20151030	long	ZRC 2017.1120	MN690002
IP0265	Arthropoda	Malacostraca	Decapoda				Caridea			85	Decapoda		93.27	Pulau Subar Darat	South lagoon	20151030	long		MN690021
IP0266	Arthropoda	Malacostraca	Decapoda				Uca	formosensis		82	Lucilia	silvarum	82.76	Pulau Subar Darat	South lagoon	20151030	long	ZRC 2017.1121	MN690003
IP0267	Arthropoda	Malacostraca	Decapoda				Caridea			85	Decapoda		93.27	Pulau Subar Darat	South lagoon	20151030	long		MN690022
IP0268	Mollusca	Gastropoda	Sacoglossa	Plakobranchidae	Elysia	ornata	Elysia	marginata	1	100	Elysia	marginata	99.69	Pulau Subar Darat	South lagoon	20151030	long	ZRC.MOL.010719	MN690316
IP0269	Mollusca	Gastropoda	Sacoglossa	Plakobranchidae	Elysia	ornata	Elysia	marginata	1	100	Elysia	marginata	100	Pulau Subar Darat	South lagoon	20151030	long	ZRC.MOL.010720	MN690317
IP0270	Arthropoda	Malacostraca	Decapoda	Xanthidae	Atergatis	integerrimus	Atergatis	integerrimus	0	100	Atergatis	integerrimus	99.69	Pulau Subar Darat	South lagoon	20151030	long	ZRC 2017.1122	MN689992
IP0271	Arthropoda	Malacostraca	Decapoda	Xanthidae	Atergatis	integerrimus	Atergatis	integerrimus	0	100	Atergatis	integerrimus	99.85	Pulau Subar Darat	South lagoon	20151030	short	ZRC 2017.1123	MN689993
IP0272	Arthropoda	Malacostraca	Decapoda	Grapsidae	Grapsus	albolineatus	Grapsus			96	Xeruca	formosensis	83.87	Pulau Subar Darat	South lagoon	20151030	long	ZRC 2017.1124	MN689986
IP0273	Arthropoda	Malacostraca	Decapoda	Alpheidae	Alpheus		Caridea			88	Decapoda		87.77	Pulau Subar Darat	South lagoon	20151030	long	ZRC 2017.1125	MN690016
IP0274	Arthropoda	Malacostraca	Decapoda	Alpheidae	Alpheus		Caridea			85	Alpheus		96.31	Pulau Subar Darat	South lagoon	20151030	long	ZRC 2017.1126	MN690011
IP0275	Cnidaria	Anthozoa	Actiniaria	Stichodactylidae	Stichodactyla	haddoni	Anthopleura	elegantissima	1	97	Stichodactyla		98.02	Pulau Subar Darat	South lagoon	20151030	long	ZRC.CNI.1253	MN690364
IP0276	Mollusca	Gastropoda	Littorinimorpha	Strombidae	Lambis	lambis	Lambis	lambis	0	99	Lambis	lambis	100	Pulau Subar Darat	South lagoon	20151030	long	ZRC.MOL.010721	MN690208
IP0277	Cnidaria	Anthozoa	Actiniaria	Boloceroididae	Boloceroides	mcmurrichi	Actiniaria			93	Cnidaria		90.52	Pulau Subar Laut	Big lagoon	20151129	long	ZRC.CNI.1254	MN690374
IP0278	Arthropoda	Malacostraca	Decapoda	Alpheidae	Alpheus		Caridea			84	Alpheus		95.79	Pulau Subar Laut	Big lagoon	20151129	long		MN690012
IP0279	Arthropoda	Malacostraca	Decapoda				Synalpheus	neptunus		82	Decapoda		83.33	Pulau Subar Laut	Big lagoon	20151129	long	ZRC 2017.1127	MN690250
IP0280	Arthropoda	Malacostraca	Decapoda											Pulau Subar Laut	Big lagoon	20151129
IP0281	Mollusca	Cephalopoda	Octopoda	Octopodidae			Octopus	oliveri		97	Octopus	oliveri	89.76	Pulau Subar Laut	Big lagoon	20151129	long	ZRC.MOL.010722	MN690166
IP0282	Echinodermata	Holothuroidea	Aspidochirotida	Holothuriidae	Holothuria	fuscocinerea								Pulau Subar Laut	Big lagoon	20151129
IP0283	Arthropoda	Malacostraca	Amphipoda				Amphipoda			97	Amphipoda		97.25	Pulau Subar Laut	Big lagoon	20151129	long		MN690042
IP0284	Mollusca	Bivalvia	Arcida	Arcidae			Barbatia	fusca		90	Barbatia	fusca	89.58	Pulau Subar Laut	Big lagoon	20151129	long		MN690566
IP0285	Mollusca	Gastropoda	Nudibranchia	Gymnodorididae	Gymnodoris		Gymnodoris	pseudobrunnea		90	Gymnodoris		90.36	Pulau Subar Laut	Big lagoon	20151129	long	ZRC.MOL.010723	MN690298
IP0286	Mollusca	Gastropoda	Sacoglossa	Plakobranchidae	Elysia	ornata								Pulau Subar Laut	Big lagoon	20151129
IP0287	Mollusca	Gastropoda	Systellommatophora	Onchidiidae	Peronia	sp. 2	Peronia	verruculata	1	99	Systellommatophora		100	Pulau Subar Laut	Big lagoon	20151129	long	ZRC.MOL.010724	MN690328
IP0288	Mollusca	Gastropoda	Systellommatophora	Onchidiidae	Peronia									Pulau Subar Laut	Big lagoon	20151129
IP0289	Arthropoda	Malacostraca	Decapoda											Tanjong Hakim NW	Reef 0 - 12m	20151204
IP0290	Mollusca	Gastropoda												Pulau Subar Laut SW	Reef 0 - 12m	20151204
IP0291	Mollusca	Gastropoda	Littorinimorpha	Cypraeidae										Pulau Subar Laut SW	Reef 0 - 12m	20151204
IP0292	Mollusca	Gastropoda	Cephalaspidea	Aglajidae	Philinopsis	pilsbryi				NA	Ophiogeron		78.37	Tanjong Hakim NW	Reef 0 - 12m	20151204	long		MN690593
IP0293	Echinodermata	Holothuroidea	Apodida	Synaptidae			Nemertean			77	Synaptula	reticulata	94.89	Tanjong Hakim NW	Reef 0 - 12m	20151204	long		MN689969
IP0294	Echinodermata	Holothuroidea	Apodida	Synaptidae			Arbacia	punctulata		77	Synaptula	reticulata	94.4	Tanjong Hakim NW	Reef 0 - 12m	20151204	long	ZRC.ECH.1250	MN689972
IP0295	Echinodermata	Holothuroidea	Apodida	Synaptidae			Eleutherozoa			82	Synaptula	reticulata	94.33	Tanjong Hakim NW	Reef 0 - 12m	20151204	long	ZRC.ECH.1251	MN689971
IP0296	Echinodermata	Holothuroidea	Apodida	Synaptidae			Emplectonema	mitsuii		79	Apodida		97.96	Tanjong Hakim NW	Reef 0 - 12m	20151204	long		MN689976
IP0297	Echinodermata	Holothuroidea	Apodida	Synaptidae			Nemertean			77	Synaptula	reticulata	95.46	Tanjong Hakim NW	Reef 0 - 12m	20151204	long	ZRC.ECH.1252	MN689970
IP0298	Echinodermata	Holothuroidea	Apodida	Synaptidae										Tanjong Hakim NW	Reef 0 - 12m	20151204
IP0299	Mollusca	Gastropoda	Nudibranchia	Gymnodorididae	Gymnodoris	impudica	Gymnodoris	pseudobrunnea	0	90	Gymnodoris		99.05	Pulau Subar Laut SW	Reef 0 - 12m	20151204	long		MN690300
IP0300	Mollusca	Gastropoda	Nudibranchia	Bornellidae	Bornella	hermanni	Bornella	hermanni	0	98	Bornella	hermanni	97.76	Pulau Subar Laut SW	Reef 0 - 12m	20151204	long	ZRC.MOL.010725	MN690322
IP0301	Mollusca	Gastropoda	Littorinimorpha	Ranellidae	Gyrineum	natator								Tanjong Hakim NW	Reef 0 - 12m	20151204
IP0302	Mollusca	Gastropoda	Nudibranchia	Discodorididae	Jorunna	funebris	Jorunna	funebris	0	86	Montereina	lentiginosa	83.72	Pulau Subar Laut SW	Reef 0 - 12m	20151204	long		MN690307
IP0303	Mollusca	Gastropoda	Nudibranchia	Phyllidiidae	Phyllidia	varicosa	Phyllidia	elegans	1	100	Phyllidia	elegans	100	Tanjong Hakim NW	Reef 0 - 12m	20151204	short		MN690599
IP0304	Mollusca	Gastropoda	Nudibranchia	Chromodorididae	Ceratosoma	gracillimum	Ceratosoma	gracillimum	0	99	Ceratosoma	ingozi	87.94	Tanjong Hakim NW	Reef 0 - 12m	20151204	long		MN690294
IP0305	Mollusca	Bivalvia	Ostreida	Pinnidae	Atrina	vexillum	Atrina	vexillum	0	100	Atrina	vexillum	97.72	Pulau Subar Laut SW	Reef 0 - 12m	20151204	long		MN690560
IP0306	Mollusca	Bivalvia	Ostreida	Pinnidae	Atrina	vexillum	Atrina	vexillum	0	100	Atrina	exusta	97.68	Pulau Subar Laut SW	Reef 0 - 12m	20151204	long		MN690561
IP0307	Mollusca	Bivalvia	Ostreida	Pinnidae	Atrina									Pulau Subar Laut SW	Reef 0 - 12m	20151204
IP0308	Mollusca	Bivalvia								NA	Fusconaia	flava	73.5	Pulau Subar Laut SW	Reef 0 - 12m	20151204	long		MN690597
IP0309	Mollusca	Bivalvia					Lima	lima		83	Pteria		77.61	Tanjong Hakim NW	Reef 0 - 12m	20151204	long		MN690579
IP0310	Mollusca	Bivalvia												Tanjong Hakim NW	Reef 0 - 12m	20151204
IP0311	Cnidaria	Anthozoa	Actiniaria				Urticinopsis	antarctica		99	Actiniaria		100	Tanjong Hakim NW	Reef 0 - 12m	20151204	short		MN690366
IP0312	Cnidaria	Anthozoa	Gorgonacea				Leptogorgia	cuspidata		97	Paraplexaura		99.85	Tanjong Hakim NW	Reef 0 - 12m	20151204	long	ZRC.CNI.1255	MN690401
IP0313	Cnidaria	Anthozoa	Alcyonacea	Alcyoniidae			Stereonephthya			99	Stereonephthya		100	Pulau Subar Laut SW	Reef 0 - 12m	20151204	short		MN690407
IP0314	Cnidaria	Anthozoa	Zoanthidea				Palythoa	caribaeorum		100	Palythoa	tuberculosa	99.84	Tanjong Hakim NW	Reef 0 - 12m	20151204	long	ZRC.CNI.1256	MN690377
IP0315	Annelida	Polychaeta	Sabellida	Serpulidae	Protula									Pulau Subar Laut SW	Reef 0 - 12m	20151204
IP0316	Mollusca	Bivalvia	Ostreida	Pteriidae	Pterelectroma	physoides								Tanjong Hakim NW	Reef 0 - 12m	20151204
IP0317	Mollusca	Bivalvia	Ostreida	Pteriidae	Pterelectroma	physoides								Tanjong Hakim NW	Reef 0 - 12m	20151204
IP0318	Mollusca	Bivalvia	Ostreida	Pteriidae	Pterelectroma	physoides	Nassarius	glans	0	79	Pteria	hirundo	73.22	Tanjong Hakim NW	Reef 0 - 12m	20151204	long		MN690581
IP0319	Mollusca	Bivalvia	Ostreida	Pteriidae	Pterelectroma	physoides	Nassarius	glans	0	79	Pteria	loveni	75.54	Tanjong Hakim NW	Reef 0 - 12m	20151204	long		MN690582
IP0320	Mollusca	Bivalvia	Ostreida	Pteriidae	Pterelectroma	physoides	Nassarius	glans	0	79	Pteria	loveni	74.87	Tanjong Hakim NW	Reef 0 - 12m	20151204	long		MN690583
IP0321	Echinodermata	Asteroidea	Valvatida	Asterinidae	Nepanthia		Patiriella	exigua		84	Echinaster		85.47	Pulau Subar Laut SE	Reef 0 - 12m	20151208	long	ZRC.ECH.1253	MN690256
IP0322	Mollusca	Gastropoda	Nudibranchia	Aegiridae	Notodoris	gardineri	Notodoris	gardineri	0	100	Notodoris	gardineri	99.85	Pulau Subar Laut SE	Reef 0 - 12m	20151208	long		MN690303
IP0323	Mollusca	Gastropoda	Nudibranchia	Aegiridae	Notodoris	gardineri								Pulau Subar Laut SE	Reef 0 - 12m	20151208
IP0324	Mollusca	Gastropoda	Nudibranchia	Flabellinidae	Coryphellina	rubrolineata	Tenellia	sibogae	0	90	Tenellia	sibogae	91.13	Pulau Subar Laut SE	Reef 0 - 12m	20151208	long	ZRC.MOL.010726	MN690325
IP0325	Mollusca	Gastropoda	Nudibranchia	Gymnodorididae	Gymnodoris		Gymnodoris	pseudobrunnea		88	Gymnodoris		90.14	Pulau Subar Laut SE	Reef 0 - 12m	20151208	long	ZRC.MOL.010727	MN690299
IP0326	Mollusca	Bivalvia	Ostreida	Pectinidae	Pedum	spondyloideum								Pulau Subar Laut SE	Reef 0 - 12m	20151208
IP0327	Arthropoda	Malacostraca	Decapoda	Diogenidae			Boninpagurus	pilosipes		87	Pagurus	boriaustraliensis	99.85	Pulau Subar Laut SE	Reef 0 - 12m	20151208	long		MN689998
IP0328	Arthropoda	Malacostraca	Decapoda	Diogenidae			Austinogebia	edulis		85	Paguridae		86.22	Pulau Subar Laut SE	Reef 0 - 12m	20151208	long		MN690044
IP0329	Cnidaria	Anthozoa	Scleractinia	Merulinidae	Cyphastrea	serailia	Cyphastrea	serailia	0	99	Cyphastrea	microphthalma	100	Pulau Subar Laut SW	Reef 0 - 12m	20151204	long	ZRC.CNI.1257	MN690387
IP0330	Cnidaria	Anthozoa	Scleractinia	Scleractinia_incertae_sedis	Leptastrea	pruinosa	Leptastrea	pruinosa	0	99	Leptastrea	purpurea	100	Pulau Subar Laut SW	Reef 0 - 12m	20151204	long	ZRC.CNI.1258	MN690388
IP0331	Cnidaria	Anthozoa	Scleractinia	Coscinaraeidae	Coscinaraea	columna	Craterastrea	levis	1	98	Psammocora	digitata	99.83	Pulau Subar Laut SW	Reef 0 - 12m	20151204	long	ZRC.CNI.1259	MN690389
IP0332	Cnidaria	Anthozoa	Scleractinia	Merulinidae	Dipsastraea	favus	Favia	favus	0	100	Acanthastrea	faviaformis	100	Pulau Subar Laut SW	Reef 0 - 12m	20151204	long	ZRC.CNI.1260	MN690382
IP0333	Cnidaria	Anthozoa	Scleractinia	Agariciidae	Pavona	explanulata	Agaricia	agaricites	1	99	Gardineroseris	planulata	100	Pulau Subar Laut SW	Reef 0 - 12m	20151204	long	ZRC.CNI.1261	MN690350
IP0334	Cnidaria	Anthozoa	Scleractinia	Psammocoridae	Psammocora	haimiana	Psammocora	contigua	1	97	Psammocora	digitata	100	Pulau Subar Laut SW	Reef 0 - 12m	20151204	long	ZRC.CNI.1262	MN690390
IP0335	Cnidaria	Anthozoa	Scleractinia	Lobophylliidae	Lobophyllia	radians	Favia	stelligera	1	97	Parascolymia	vitiensis	100	Pulau Subar Laut SW	Reef 0 - 12m	20151204	long	ZRC.CNI.1263	MN690385
IP0336	Cnidaria	Anthozoa	Scleractinia	Fungiidae	Lithophyllon	scabra								Pulau Subar Laut SW	Reef 0 - 12m	20151204
IP0337	Cnidaria	Anthozoa	Scleractinia	Dendrophylliidae	Turbinaria	peltata	Turbinaria	peltata	0	99	Turbinaria	peltata	100	Pulau Subar Laut SW	Reef 0 - 12m	20151204	long	ZRC.CNI.1264	MN690342
IP0338	Cnidaria	Anthozoa	Scleractinia	Poritidae	Goniopora	columna	Porites	porites		97	Goniopora		100	Pulau Subar Laut SW	Reef 0 - 12m	20151204	long	ZRC.CNI.1265	MN690336
IP0339	Cnidaria	Anthozoa	Scleractinia	Fungiidae	Podabacia	crustacea	Craterastrea	levis	1	98	Leptoseris	explanata	100	Pulau Subar Laut SW	Reef 0 - 12m	20151204	long	ZRC.CNI.1266	MN690391
IP0340	Cnidaria	Anthozoa	Scleractinia	Lobophylliidae	Acanthastrea	echinata	Acanthastrea	echinata	0	94	Acanthastrea	rotundaflora	100	Pulau Subar Laut SW	Reef 0 - 12m	20151204	long	ZRC.CNI.1267	MN690380
IP0341	Cnidaria	Anthozoa	Scleractinia	Lobophylliidae	Oxypora	lacera	Favia	stelligera	1	99	Oxypora	lacera	100	Pulau Subar Laut SW	Reef 0 - 12m	20151204	long	ZRC.CNI.1268	MN690381
IP0342	Cnidaria	Anthozoa	Scleractinia	Merulinidae	Dipsastraea	maxima	Favia	favus	1	100	Favia	speciosa	100	Pulau Subar Laut SW	Reef 0 - 12m	20151204	long	ZRC.CNI.1269	MN690383
IP0343	Cnidaria	Anthozoa	Scleractinia	Scleractinia_incertae_sedis	Plesiastrea	versipora	Plesiastrea	versipora	0	100	Trochocyathus	efateensis	99.49	Pulau Subar Laut SW	Reef 0 - 12m	20151204	long	ZRC.CNI.1270	MN690386
IP0344	Cnidaria	Anthozoa	Scleractinia	Siderastreidae	Pseudosiderastrea	tayami	Siderastrea	siderea	1	97	Pseudosiderastrea	tayami	99.7	Pulau Subar Laut SW	Reef 0 - 12m	20151204	long	ZRC.CNI.1271	MN690348
IP0345	Cnidaria	Anthozoa	Scleractinia	Poritidae	Bernardpora	stutchburyi	Porites	astreoides	1	98	Goniopora	stutchburyi	99.85	Pulau Subar Laut SW	Reef 0 - 12m	20151204	long	ZRC.CNI.1272	MN690337
IP0346	Cnidaria	Anthozoa	Scleractinia	Merulinidae	Oulophyllia	bennettae	Favia	favus	1	99	Mycedium	elephantotus	100	Pulau Subar Laut SW	Reef 0 - 12m	20151204	long	ZRC.CNI.1273	MN690384
IP0347	Cnidaria	Anthozoa	Scleractinia	Scleractinia_incertae_sedis	Pachyseris	speciosa	Galaxea	fascicularis	1	98	Pachyseris	speciosa	99.68	Pulau Subar Laut SW	Reef 0 - 12m	20151204	short	ZRC.CNI.1274	MN690347
IP0348	Arthropoda	Malacostraca	Decapoda	Diogenidae			Austinogebia	edulis		86	Paguridae		86.48	Pulau Subar Laut SE	Reef 0 - 12m	20151208	long		MN690046
IP0349	Annelida	Polychaeta	Sabellida	Serpulidae	Protula		Brachidontes	adamsianus		81	Sarostegia	oculata	74.17	Pulau Subar Laut SE	Reef 0 - 12m	20151208	short		MN690577
IP0350	Mollusca	Bivalvia	Carditida	Carditidae	Beguina	semiorbiculata	Cardita	calyculata	0	87	Cardita	calyculata	85.8	Pulau Subar Laut SE	Reef 0 - 12m	20151208	long	ZRC.MOL.010728	MN690575
IP0351	Mollusca	Gastropoda	Nudibranchia	Phyllidiidae	Phyllidia		Phyllidia	elegans		100	Phyllidia	elegans	100	Pulau Subar Laut SE	Reef 0 - 12m	20151208	short	ZRC.MOL.010729	MN690330
IP0352	Mollusca	Gastropoda	Nudibranchia	Phyllidiidae	Phyllidia	varicosa	Phyllidia	varicosa	0	100	Phyllidia	varicosa	100	Pulau Subar Laut SE	Reef 0 - 12m	20151208	short		MN690288
IP0353	Platyhelminthes	Rhabditophora	Polycladida	Pseudocerotidae	Pseudoceros	concinnus								Pulau Subar Laut SE	Reef 0 - 12m	20151208
IP0354	Mollusca	Gastropoda	Nudibranchia	Chromodorididae	Ceratosoma	gracillimum	Ceratosoma	gracillimum	0	99	Gastropoda		85.58	Pulau Subar Laut SE	Reef 0 - 12m	20151208	short	ZRC.MOL.010730	MN690296
IP0355	Cnidaria	Anthozoa	Scleractinia	Dendrophylliidae	Tubastraea		Tubastraea	tagusensis		98	Balanophyllia	imperialis	100	Pulau Subar Laut SE	Reef 0 - 12m	20151208	long	ZRC.CNI.1252	MN690340
IP0356	Cnidaria	Anthozoa	Scleractinia	Dendrophylliidae	Tubastraea		Tubastraea	coccinea		99	Tubastraea	micranthus	100	Pulau Subar Laut SE	Reef 0 - 12m	20151208	long	ZRC.CNI.1282	MN690341
IP0357	Cnidaria	Anthozoa	Scleractinia	Acroporidae	Acropora		Acropora	digitifera		99	Acropora	tenuis	100	Pulau Subar Laut SE	Reef 0 - 12m	20151208	long	ZRC.CNI.1275	MN690344
IP0358	Cnidaria	Hydrozoa					Chromatonema	rubrum		83	Sertularella	diaphana	87.82	Pulau Subar Laut SE	Reef 0 - 12m	20151208	short	ZRC.CNI.1276	MN690408
IP0359	Cnidaria	Anthozoa	Gorgonacea				Antipathes	grandis		100	Antipathes	grandis	100	Pulau Subar Laut SE	Reef 0 - 12m	20151208	long	ZRC.CNI.1277	MN690355
IP0360	Cnidaria	Anthozoa	Corallimorpharia				Discosoma			99	Discosoma		100	Pulau Subar Laut SE	Reef 0 - 12m	20151208	long	ZRC.CNI.1278	MN690351
IP0361	Echinodermata	Crinoidea	Comatulida	Comatulidae	Comatula	purpurea								Pulau Subar Laut SE	Reef 0 - 12m	20151208
IP0362	Cnidaria	Anthozoa	Actiniaria	Nemanthidae	Nemanthus		Hormathia	digitata		95	Anthozoa		97.5	Pulau Subar Laut SE	Reef 0 - 12m	20151208	long		MN690371
IP0363	Mollusca	Bivalvia	Ostreida	Pteriidae			Pygolabis			84	Pteria		77.45	Pulau Subar Laut SE	Reef 0 - 12m	20151208	long		MN690584
IP0364	Cnidaria	Hydrozoa	Antipatharia				Myriopathes	ulex		99	Myriopathes	japonica	99.26	Pulau Subar Laut SE	Reef 0 - 12m	20151208	long		MN690356
IP0365	Arthropoda	Malacostraca	Decapoda	Xanthidae	Pilodius		Pilodius	granulatus		98	Pilodius	granulatus	98.24	Pulau Subar Laut	Big lagoon	20151211	long		MN689995
IP0366	Arthropoda	Malacostraca	Decapoda											Pulau Subar Laut	Big lagoon	20151211
IP0367	Mollusca	Gastropoda	Pleurobranchomorpha	Pleurobranchaeidae	Euselenops	luniceps	Doriprismatica	stellata	0	84	Pleurobranchaeidae		87.88	Pulau Subar Laut	Big lagoon	20151211	long	ZRC.MOL.010731	MN690297
IP0368	Mollusca	Gastropoda	Littorinimorpha	Naticidae	Notocochlis	gualtieriana	Falsicingula	mundana	0	89	Littorinimorpha		97.44	Pulau Subar Laut	Big lagoon	20151211	short	ZRC.MOL.010732	MN690192
IP0369	Mollusca	Bivalvia	Limida	Limidae	Limaria	fragilis	Limaria	pellucida	0	78	Limidae		71.09	Pulau Subar Laut	Big lagoon	20151211	long	ZRC.MOL.010733	MN690572
IP0370	Arthropoda	Insecta	Hemiptera	Gerridae	Halobates	hayanus	Perittopus	horvathi	0	90	Halobates		93.72	Pulau Subar Laut	Big lagoon	20151211	long		MN690241
IP0371	Mollusca	Gastropoda	Sacoglossa	Costasiellidae	Costasiella	kuroshimae	Costasiella	usagi	0	90	Costasiella	usagi	90.06	Pulau Subar Laut	Big lagoon	20151211	long	ZRC.MOL.010734	MN690318
IP0372	Arthropoda	Malacostraca	Decapoda	Palaemonidae	Ancylocaris	brevicarpalis	Periclimenes	brevicarpalis	0	99	Nematocarcinus		81.04	Pulau Subar Laut	Big lagoon	20151211	long	ZRC 2017.1128	MN690095
IP0373	Mollusca	Bivalvia												Pulau Subar Laut	Big lagoon	20151211
IP0374	Mollusca	Bivalvia	Carditida	Carditidae	Cardita	variegata								Pulau Subar Laut	Big lagoon	20151211
IP0375	Mollusca	Bivalvia	Carditida	Carditidae	Cardita	variegata	Cardita	variegata	0	96	Cardita	variegata	95.5	Pulau Subar Laut	Big lagoon	20151211	long	ZRC.MOL.010735	MN690574
IP0376	Cnidaria	Anthozoa	Actiniaria				Anthopleura	elegantissima		98	Anemonia		100	Pulau Subar Laut	Big lagoon	20151211	long		MN690363
IP0377	Cnidaria	Anthozoa	Actiniaria	Actiniidae	Isactinia	citrina	Anthopleura	elegantissima		98	Anemonia		100	Pulau Subar Laut	Big lagoon	20151211	long	ZRC.CNI.1279	MN690360
IP0378	Cnidaria	Anthozoa	Actiniaria				Anthopleura	elegantissima		98	Anemonia		100	Pulau Subar Laut	Big lagoon	20151211	long		MN690362
IP0379	Cnidaria	Anthozoa	Scleractinia	Poritidae	Porites	monticulosa	Porites	astreoides	1	99	Porites		100	Pulau Subar Darat N	Reef 0 - 12m	20151218	long	ZRC.CNI.1280	MN690338
IP0380	Cnidaria	Anthozoa	Scleractinia	Poritidae	Porites	rus	Porites	astreoides	1	100	Porites	rus	100	Pulau Subar Darat N	Reef 0 - 12m	20151218	long	ZRC.CNI.1281	MN690339
IP0381	Cnidaria	Anthozoa	Scleractinia	Acroporidae	Alveopora		Montipora	digitata		94	Alveopora		99.85	Pulau Subar Darat N	Reef 0 - 12m	20151218	long		MN690349
IP0382	Platyhelminthes	Rhabditophora	Polycladida	Pseudocerotidae	Pseudobiceros	damawan	Pseudoceros	concinnus	0	88	Turbellaria		81.7	Tanjong Hakim NW	Reef 0 - 12m	20151218	short		MN690537
IP0383	Platyhelminthes	Rhabditophora	Polycladida	Pseudocerotidae	Pseudoceros	hancockanus	Pseudobiceros	bedfordi	0	86	Turbellaria		88.78	Tanjong Hakim NW	Reef 0 - 12m	20151218	short	ZRC.PLA.0362	MN690535
IP0384	Mollusca	Gastropoda	Nudibranchia	Chromodorididae	Glossodoris	rufomarginata	Glossodoris	rufomarginata	0	100	Glossodoris	rufomarginata	91.67	Tanjong Hakim NW	Reef 0 - 12m	20151218	short	ZRC.MOL.010736	MN690291
IP0385	Mollusca	Gastropoda	Nudibranchia	Phyllidiidae	Phyllidiella		Phyllidiella	lizae		98	Phyllidiella	rudmani	99.31	Tanjong Hakim NW	Reef 0 - 12m	20151218	short	ZRC.MOL.010737	MN690286
IP0386	Arthropoda	Pycnogonida					Anoplodactylus	californicus		88	Anoplodactylus		85.77	Tanjong Hakim NW	Reef 0 - 12m	20151218	long		MN690236
IP0387	Mollusca	Bivalvia	Ostreida	Pectinidae										Tanjong Hakim NW	Reef 0 - 12m	20151218
IP0388	Cnidaria	Anthozoa	Actiniaria	Nemanthidae	Nemanthus		Hormathia	digitata		96	Anthozoa		97.4	Tanjong Hakim NW	Reef 0 - 12m	20151218	long	ZRC.CNI.1283	MN690372
IP0389	Echinodermata	Holothuroidea	Apodida	Synaptidae			Eleutherozoa			80	Synaptula	reticulata	99.39	Tanjong Hakim NW	Reef 0 - 12m	20151218	short	ZRC.ECH.1254	MN689975
IP0390	Arthropoda	Malacostraca	Decapoda	Trapeziidae			Brachyura			100	Decapoda		100	Tanjong Hakim NW	Reef 0 - 12m	20151218	long		MN689996
IP0391	Mollusca	Bivalvia	Ostreida	Ostreidae			Crassostrea	ariakensis		96	No	match	-	Tanjong Hakim NW	Reef 0 - 12m	20151218	short		MN690595
IP0392	Mollusca	Gastropoda	Neogastropoda	Muricidae	Mancinella	echinata	Mancinella	echinata	0	99	Mancinella	echinata	99.26	Tanjong Hakim NW	Reef 0 - 12m	20151218	long		MN690184
IP0393	Cnidaria	Anthozoa	Zoanthidea				Palythoa	caribaeorum		100	Palythoa	tuberculosa	100	Tanjong Hakim NW	Reef 0 - 12m	20151218	long	ZRC.CNI.1284	MN690378
IP0394	Porifera	Demospongiae	Haplosclerida	Petrosiidae			Xestospongia			93	Oceanapia		94.4	Tanjong Hakim NW	Reef 0 - 12m	20151218	short	ZRC.POR. 0485	MN690393
IP0395	Porifera													Tanjong Hakim NW	Reef 0 - 12m	20151218
IP0396	Porifera													Tanjong Hakim NW	Reef 0 - 12m	20151218
IP0397	Mollusca	Gastropoda	Nudibranchia	Discodorididae	Discodoris	boholiensis	Geitodoris	heathi	0	82	Geitodoris	heathi	82.57	Pulau Subar Laut	Big lagoon	20151225	long	ZRC.MOL.010738	MN690308
IP0398	Mollusca	Gastropoda	Nudibranchia	Dendrodorididae	Dendrodoris	fumata	Dendrodoris	fumata	0	98	Dendrodoris	fumata	94.06	Pulau Subar Laut	Big lagoon	20151225	long	ZRC.MOL.010739	MN690567
IP0399	Arthropoda	Malacostraca	Decapoda	Penaeidae			Fenneropenaeus	indicus		85	Fenneropenaeus	indicus	85.5	Pulau Subar Laut	Big lagoon	20151225	long	ZRC 2017.1129	MN690005
IP0400	Platyhelminthes	Rhabditophora	Polycladida	Pseudocerotidae	Acanthozoon		Platyhelminthes			84	Turbellaria		81.99	Pulau Subar Laut	Big lagoon	20151225	short		MN690534
IP0401	Mollusca	Gastropoda	Littorinimorpha	Naticidae	Polinices	mammilla								Pulau Subar Laut	Big lagoon	20151225
IP0402	Mollusca	Gastropoda	Littorinimorpha	Naticidae	Polinices	mammilla	Polinices	mammilla	0	99	Naticidae		92.31	Pulau Subar Laut	Big lagoon	20151225	short	ZRC.MOL.010740	MN690195
IP0403	Mollusca	Bivalvia	Ostreida	Pinnidae	Atrina	vexillum	Atrina	vexillum	0	100	Atrina	vexillum	97.72	Pulau Subar Laut	Big lagoon	20151225	long	ZRC.MOL.010741	MN690562
IP0404	Mollusca	Bivalvia	Ostreida	Pinnidae	Atrina	vexillum	Atrina	vexillum	0	100	Atrina	vexillum	97.87	Pulau Subar Laut	Big lagoon	20151225	long	ZRC.MOL.010742	MN690563
IP0405	Mollusca	Bivalvia	Ostreida	Pinnidae	Atrina	vexillum	Atrina	vexillum	0	99	Atrina	vexillum	97.38	Pulau Subar Laut	Big lagoon	20151225	long	ZRC.MOL.010743	MN690564
IP0406	Arthropoda	Malacostraca	Decapoda	Majoidea			Brachyura			87	Decapoda		87.22	Pulau Subar Laut	Big lagoon	20151225	long		MN689997
IP0407	Annelida	Polychaeta	Phyllodocida	Hesionidae	Leocrates		Perinereis	gualpensis		81	Hesione	panamena	83.96	Pulau Subar Laut	Big lagoon	20151225	long	ZRC.ANN.0372	MN690216
IP0408	Arthropoda	Malacostraca	Decapoda				Xanthidae			88	Pilumnidae		88.84	Pulau Subar Laut	Big lagoon	20151225	long		MN689980
IP0409	Annelida	Polychaeta	Phyllodocida	Polynoidae	Lepidonotus		Lepidonotus	squamatus		79	Polynoidae		82.52	Pulau Subar Laut	Big lagoon	20151225	long		MN690220
IP0410	Arthropoda	Malacostraca	Decapoda				Exoclimenella	maldivensis		82	Hippolyte		82.87	Pulau Subar Laut	Big lagoon	20151225	long		MN690037
IP0411	Annelida	Polychaeta	Nereididae				Pseudonereis	variegata		80	Alitta	succinea	81.87	Pulau Subar Laut	Big lagoon	20151225	long	ZRC.ANN.0373	MN690221
IP0412	Arthropoda	Malacostraca	Decapoda	Palaemonidae	Phycomenes		Phycomenes	sulcatus		99	Alvinocaris	chelys	79.53	Pulau Subar Laut	Big lagoon	20151225	long		MN690097
IP0413	Cnidaria	Anthozoa	Actiniaria	Phymanthidae	Phymanthus		Anthopleura	elegantissima		98	Actiniaria		99.69	Pulau Subar Laut	Big lagoon	20151225	long	ZRC.CNI.1285	MN690359
IP0414	Cnidaria	Anthozoa	Actiniaria	Phymanthidae	Phymanthus		Anthopleura	elegantissima		98	Actiniaria		99.69	Pulau Subar Laut	Big lagoon	20151225	long	ZRC.CNI.1286	MN690361
IP0415	Platyhelminthes	Rhabditophora	Polycladida	Pseudocerotidae	Pseudobiceros	damawan	Pseudoceros	concinnus	0	88	Turbellaria		81.37	Pulau Tekukor	Reef 0 - 12m	20160104	short		MN690538
IP0416	Cnidaria	Anthozoa	Scleractinia	Euphylliidae	Euphyllia	ancora	Stephanocoenia	michelinii	0	94	Euphyllia	divisa	100	Pulau Subar Laut SE	Reef 0 - 12m	20160104	long	ZRC.CNI.1247	MN690346
IP0417	Platyhelminthes	Rhabditophora	Polycladida	Pseudocerotidae	Pseudobiceros	damawan	Pseudoceros	concinnus	0	88	Turbellaria		82.03	Pulau Tekukor	Reef 0 - 12m	20160104	short	ZRC.PLA.0363	MN690539
IP0418	Platyhelminthes	Rhabditophora	Polycladida	Pseudocerotidae	Pseudobiceros	fulgor	Pseudoceros	cf. chromodorus	0	86	Gastropoda		97.76	Pulau Subar Laut SE	Reef 0 - 12m	20160104	short	ZRC.PLA.0364	MN690540
IP0419	Platyhelminthes	Rhabditophora	Polycladida	Pseudocerotidae	Pseudobiceros		Pseudoceros	concinnus		83	Turbellaria		81.05	Pulau Subar Laut SE	Reef 0 - 12m	20160104	long		MN690541
IP0420	Platyhelminthes	Rhabditophora	Polycladida	Pseudocerotidae	Pseudoceros	hancockanus	Platyhelminthes			88	Turbellaria		89.1	Pulau Tekukor	Reef 0 - 12m	20160104	short		MN690536
IP0421	Mollusca	Gastropoda	Nudibranchia	Chromodorididae	Ceratosoma	gracillimum	Ceratosoma	gracillimum	0	99	Ceratosoma	ingozi	88.11	Pulau Subar Laut SE	Reef 0 - 12m	20160104	long	ZRC.MOL.010744	MN690295
IP0422	Mollusca	Gastropoda	Nudibranchia	Phyllidiidae	Phyllidia		Phyllidia	picta		99	Phyllidia	varicosa	91.41	Pulau Subar Laut SE	Reef 0 - 12m	20160104	short	ZRC.MOL.010745	MN690289
IP0423	Mollusca	Gastropoda	Nudibranchia	Facelinidae	Pteraeolidia		Pteraeolidia	ianthina		99	Pteraeolidia	ianthina	99.35	Pulau Tekukor	Reef 0 - 12m	20160104	long		MN690489
IP0424	Echinodermata	Asteroidea	Valvatida	Goniasteridae	Iconaster	longimanus	Acanthaster	planci	0	81	Pentagonaster	duebeni	86.46	Pulau Subar Laut SE	Reef 0 - 12m	20160104	short		MN690555
IP0425	Cnidaria	Anthozoa	Alcyonacea				Leptogorgia	cuspidata		96	Siphonogorgia		99.22	Pulau Subar Laut SE	Reef 0 - 12m	20160104	long	ZRC.CNI.1287	MN690403
IP0426	Cnidaria	Anthozoa	Alcyonacea				Leptogorgia	cuspidata		95	Iciligorgia	brunnea	100	Pulau Subar Laut SE	Reef 0 - 12m	20160104	long	ZRC.CNI.1288	MN690399
IP0427	Cnidaria	Anthozoa	Alcyonacea				Carijoa			95	Solenoculon		99.85	Pulau Subar Laut SE	Reef 0 - 12m	20160104	long		MN690398
IP0428	Arthropoda	Hexanauplia	Sessilia	Archaeobalanidae	Striatobalanus	amaryllis	Striatobalanus	amaryllis	0	98	Striatobalanus	amaryllis	98.5	Pulau Subar Laut SE	Reef 0 - 12m	20160104	long		MN690055
IP0429	Arthropoda	Hexanauplia	Sessilia	Archaeobalanidae	Striatobalanus	amaryllis	Striatobalanus	amaryllis	0	98	Striatobalanus	amaryllis	98.07	Pulau Subar Laut SE	Reef 0 - 12m	20160104	long	ZRC 2017.1130	MN690056
IP0430	Mollusca	Bivalvia	Ostreida	Ostreidae	Dendostrea		Dendostrea	frons		99	Dendostrea	frons	95.71	Pulau Tekukor	Reef 0 - 12m	20160104	long	ZRC.MOL.010746	MN690594
IP0431	Cnidaria	Anthozoa	Actiniaria				Hormathia	digitata		95	Anthozoa		97.55	Pulau Subar Laut SE	Reef 0 - 12m	20160104	long		MN690373
IP0432	Mollusca	Bivalvia	Ostreida	Ostreidae			Pteria	loveni		99	Pteria		75	Pulau Tekukor	Reef 0 - 12m	20160104	long		MN690580
IP0433	Arthropoda	Malacostraca	Decapoda	Pandalidae	Chlorotocella		Chlorotocella	gracilis		99	Pleoticus	robustus	85	Pulau Subar Laut SE	Reef 0 - 12m	20160104	long		MN690038
IP0434	Arthropoda	Malacostraca	Decapoda	Pandalidae	Chlorotocella		Chlorotocella	gracilis		99	Pelecocera	scaevoides	87.2	Pulau Subar Laut SE	Reef 0 - 12m	20160104	short		MN690039
IP0435	Annelida	Polychaeta	Sabellida	Terebellidae										Pulau Tekukor	Reef 0 - 12m	20160104
IP0436	Annelida	Polychaeta					Terebellidae			80	Notaulax		93.27	Pulau Tekukor	Reef 0 - 12m	20160104	long		MN690222
IP0437	Chordata	Ascidiacea												Pulau Subar Laut SE	Reef 0 - 12m	20160104
IP0438	Cnidaria	Anthozoa	Corallimorpharia	Discosomidae	Rhodactis	indosinensis	Rhodactis			99	Rhodactis		100	Pulau Subar Laut SE	Reef 0 - 12m	20160104	long	ZRC.CNI.1289	MN690353
IP0439	Chordata	Ascidiacea	Aplousobranchia				Didemnum	fragile		93	Didemnum		88.03	Pulau Subar Laut SE	Reef 0 - 12m	20160104	short		MN690552
IP0440	Chordata	Ascidiacea					Polycitorella	coronaria		84	Trididemnum	maragogi	81.74	Pulau Subar Laut SE	Reef 0 - 12m	20160104	short		MN690547
IP0441	Porifera	Demospongiae	Poecilosclerida				Clathria	rugosa		95	Clathria	rugosa	94.8	Pulau Subar Laut SE	Reef 0 - 12m	20160104	long		MN690394
IP0442	Porifera													Pulau Subar Laut SE	Reef 0 - 12m	20160104
IP0443	Cnidaria	Anthozoa	Actiniaria				Rhodactis			100	Rhodactis		100	Pulau Subar Laut SE	Reef 0 - 12m	20160104	long		MN690354
IP0444	Cnidaria	Anthozoa	Actiniaria				Discosoma			99	Discosoma		100	Pulau Subar Laut SE	Reef 0 - 12m	20160104	long		MN690352
IP0445	Chordata	Ascidiacea					Eudistoma	viride		81	Eudistoma	amplum	80	Pulau Subar Laut SE	Reef 0 - 12m	20160104	short		MN690548
IP0446	Chordata	Ascidiacea	Aplousobranchia	Polycitoridae			Eudistoma	amplum		95	Eudistoma	amplum	94.9	Pulau Subar Laut SE	Reef 0 - 12m	20160104	short		MN690549
IP0447	Platyhelminthes	Rhabditophora	Polycladida	Pseudocerotidae	Pseudobiceros	damawan								Pulau Subar Laut SW	Reef 0 - 12m	20160420
IP0448	Chordata	Actinopterygii	Syngnathiformes	Syngnathidae			Torquigener	flavimaculosus		83	Pseudocorynopoma	doriae	84.7	Pulau Subar Laut SW	Reef 0 - 12m	20160420	long		MN690417
IP0449	Arthropoda	Malacostraca	Decapoda	Matutidae	Ashtoret	lunaris	Matuta	lunaris	0	91	Ashtoret	lunaris	99.09	Pulau Subar Laut	Big lagoon	20160722	long	ZRC 2017.1131	MN689982
IP0450	Arthropoda	Malacostraca	Decapoda	Xanthidae	Atergatis	floridus								Pulau Subar Laut	Big lagoon	20160722
IP0451	Arthropoda	Malacostraca	Decapoda	Palaemonidae	Ancylocaris	brevicarpalis	Periclimenes	brevicarpalis	0	99	Decapoda		81.04	Pulau Subar Laut	Big lagoon	20160722	long		MN690096
IP0452	Chordata	Actinopterygii	Perciformes	Gerreidae	Gerres	oyena	Gerres	oyena	0	100	Gerres	oyena	100	Pulau Subar Laut	Big lagoon	20160722	long		MN690420
IP0453	Chordata	Actinopterygii	Perciformes	Gerreidae	Gerres	oyena	Gerres	oyena	0	100	Gerres	oyena	100	Pulau Subar Laut	Big lagoon	20160722	long		MN690421
IP0454	Chordata	Actinopterygii	Perciformes	Pomacentridae			Pomacentrus			92	Pomacentrus	adelus	92.78	Pulau Subar Laut	Big lagoon	20160722	long		MN690423
IP0455	Chordata	Actinopterygii	Tetraodontiformes	Monacanthidae	Acreichthys		Acreichthys	tomentosus		99	Acreichthys	tomentosus	100	Pulau Subar Laut	Big lagoon	20160722	short		MN690449
IP0456	Chordata	Actinopterygii	Anguilliformes	Ophichthidae	Muraenichthys		Neenchelys	parvipectoralis		85	Scolecenchelys	macroptera	91.24	Pulau Subar Laut	Big lagoon	20160722	long		MN690418
IP0457	Arthropoda	Malacostraca	Decapoda				Petrolisthes	armatus		85	Petrolisthes		86.85	Pulau Subar Laut	Big lagoon	20160722	long	ZRC 2017.1132	MN690033
IP0458	Chordata	Actinopterygii	Perciformes	Gobiidae										Pulau Subar Laut	Big lagoon	20160722
IP0459	Chordata	Actinopterygii	Perciformes	Gobiidae			Istigobius	rigilius		88	Istigobius	rigilius	87.69	Pulau Subar Laut	Big lagoon	20160722	long		MN690436
IP0460	Platyhelminthes	Rhabditophora	Polycladida	Pseudocerotidae	Pseudoceros	concinnus	Pseudoceros	concinnus	0	99	Sarostegia	oculata	82.83	Tanjong Hakim NW	Reef 0 - 12m	20160808	short	ZRC.PLA.0365	MN690543
IP0461	Mollusca	Gastropoda	Nudibranchia	Facelinidae	Pteraeolidia	ianthina	Pteraeolidia	ianthina	0	99	Pteraeolidia	ianthina	99.2	Tanjong Hakim NW	Reef 0 - 12	20160808	short	ZRC.MOL.010747	MN690492
IP0462	Mollusca	Gastropoda	Nudibranchia	Chromodorididae	Doriprismatica	atromarginata	Doriprismatica	atromarginata	0	99	Doriprismatica	atromarginata	97.73	Tanjong Hakim NW	Reef 0 - 12	20160808	short	ZRC.MOL.010748	MN690310
IP0463	Mollusca	Gastropoda	Littorinimorpha	Cypraeidae	Mauritia	arabica	Mauritia	arabica	0	100	Mauritia	arabica	100	Tanjong Hakim NW	Reef 0 - 12	20160808	short	ZRC.MOL.010749	MN690207
IP0464	Chordata	Actinopterygii	Perciformes	Pomacentridae	Pomacentrus	tripunctatus								Tanjong Hakim NW	Reef 0 - 12	20160808
IP0465	Chordata	Actinopterygii	Syngnathiformes	Syngnathidae			Halicampus	nitidus		86	Halicampus	dunckeri	99.84	Tanjong Hakim NW	Reef 0 - 12	20160808	long		MN690419
IP0466	Chordata	Actinopterygii	Perciformes	Pomacentridae			Pomacentrus	moluccensis		91	Pomacentrus	littoralis	100	Tanjong Hakim NW	Reef 0 - 12	20160808	short		MN690426
IP0467	Chordata	Actinopterygii	Perciformes	Apogonidae	Ostorhinchus	margaritophorus	Ostorhinchus	margaritophorus	0	93	Ostorhinchus	margaritophorus	92.48	Tanjong Hakim NW	Reef 0 - 12	20160808	short		MN690446
IP0468	Chordata	Actinopterygii	Perciformes	Pomacentridae	Pomacentrus	tripunctatus	Pomacentrus	moluccensis	0	91	Pomacentrus	littoralis	100	Tanjong Hakim NW	Reef 0 - 12	20160808	short		MN690424
IP0469	Mollusca	Bivalvia	Ostreida	Pectinidae										Tanjong Hakim NW	Reef 0 - 12	20160808
IP0470	Mollusca	Bivalvia	Ostreida	Pectinidae										Tanjong Hakim NW	Reef 0 - 12	20160808
IP0471	Cnidaria	Anthozoa	Actiniaria	Actiniidae	Entacmaea	quadricolor	Urticinopsis	antarctica		99	Actiniaria		100	Tanjong Hakim NW	Reef 0 - 12	20160808	short		MN690368
IP0472	Cnidaria	Anthozoa	Actiniaria	Ceriantharia										Tanjong Hakim NW	Reef 0 - 12	20160808
IP0473	Cnidaria	Anthozoa	Actiniaria	Ceriantharia										Tanjong Hakim NW	Reef 0 - 12	20160808
IP0474	Echinodermata	Asteroidea	Valvatida	Oreasteridae	Culcita	novaeguineae								Pulau Tekukor	Reef 0 - 12	20161208
IP0475	Arthropoda	Malacostraca	Decapoda				Anomura			96	Paguridae		95.56	Pulau Subar Darat N	Reef 0 - 12	20161010	short		MN690093
IP0476	Mollusca	Gastropoda					Gastropoda			89	Columbellidae		96.12	Pulau Subar Laut SE	Reef 0 - 12	20161011	short		MN690205
IP0477	Mollusca	Gastropoda	Neogastropoda	Columbellidae	Pardalinops	testudinaria	Euplica	scripta	1	99	Euplica	varians	99.35	Pulau Subar Laut SE	Reef 0 - 12	20161011	short	ZRC.MOL.010750	MN690206
IP0478	Chordata	Actinopterygii	Perciformes	Pomacentridae	Amphiprion	clarkii	Amphiprion	sebae	1	100	Amphiprion	sebae	100	Pulau Subar Laut SE	Reef 0 - 12	20161011	short		MN690427
IP0479	Chordata	Actinopterygii	Perciformes	Pomacentridae	Amphiprion	frenatus	Amphiprion	melanopus	1	100	Amphiprion	melanopus	100	Pulau Subar Laut SE	Reef 0 - 12	20161011	short		MN690428
IP0480	Platyhelminthes	Rhabditophora	Polycladida	Pseudocerotidae	Pseudoceros	laingensis	Pseudoceros			96	Platyhelminthes		76.67	Tanjong Hakim SW	Reef 0 - 12m	20161024	short		MN690544
IP0481	Echinodermata	Ophiuroidea	Ophiurida				Macrophiothrix	melanosticta		91	Ophiothrix	striolata	85.76	Tanjong Hakim SW	Reef 0 - 12	20161024	short		MN690279
IP0482	Platyhelminthes	Rhabditophora	Polycladida	Pseudocerotidae	Pseudoceros	laingensis	Pseudoceros			96	Platyhelminthes		83.5	Tanjong Hakim SW	Reef 0 - 12m	20161024	short		MN690545
IP0483	Arthropoda	Malacostraca	Decapoda				Culex	restuans		81	Culicoides		84.68	Tanjong Hakim SW	Reef 0 - 12	20161024	short		MN690048
IP0484	Chordata	Actinopterygii	Perciformes	Pomacentridae	Pomacentrus	tripunctatus	Pomacentrus	moluccensis	0	91	Pomacentrus	littoralis	100	Tanjong Hakim SW	Reef 0 - 12	20161024	short		MN690425
IP0485	Chordata	Actinopterygii	Perciformes	Serranidae	Epinephelus	quoyanus	Epinephelus	quoyanus	0	100	Epinephelus	quoyanus	100	Tanjong Hakim SW	Reef 0 - 12	20161024	short		MN690431
IP0486	Chordata	Actinopterygii	Perciformes	Chaetodontidae	Chelmon	rostratus	Chelmon	rostratus	0	100	Chelmon	rostratus	100	Tanjong Hakim SW	Reef 0 - 12	20161027	short		MN690448
IP0487	Cnidaria	Anthozoa	Actiniaria	Actiniidae	Condylactis	doreensis	Anthopleura	elegantissima		99	Actiniaria		100	Pulau Subar Darat SW	Reef 0 - 12	20161027	short		MN690369
IP0488	Chordata	Actinopterygii	Perciformes	Pomacentridae	Amphiprion	ocellaris	Amphiprion	ocellaris	0	100	Amphiprion	ocellaris	100	Pulau Subar Darat SW	Reef 0 - 12	20161027	short		MN690429
IP0489	Arthropoda	Malacostraca	Decapoda	Trapeziidae	Trapezia	cymodoce	Brachyura			99	Decapoda		100	Pulau Subar Darat SW	Reef 0 - 12	20161027	short		MN690049
IP0490	Chordata	Actinopterygii	Perciformes	Chaetodontidae	Chelmon	rostratus	Chelmon	rostratus	0	100	Chelmon	rostratus	100	Tanjong Hakim SW	Reef 0 - 12	20161027	short		MN690447
IP0491	Chordata	Actinopterygii	Perciformes	Labridae	Cheilinus	trilobatus	Cheilinus	fasciatus	1	100	Cheilinus	fasciatus	100	Tanjong Hakim SW	Reef 0 - 12	20161027	short		MN690430
IP0492	Chordata	Actinopterygii	Perciformes	Caesionidae	Caesio	cuning	Caesio	cuning	0	99	Caesio	cuning	100	Tanjong Hakim SW	Reef 0 - 12	20161027	short		MN690432
IP0493	Chordata	Actinopterygii	Perciformes	Chaetodontidae	Chaetodon	octofasciatus	Chaetodon	aureofasciatus	1	99	Chaetodon	octofasciatus	100	Tanjong Hakim SW	Reef 0 - 12	20161027	short		MN690433
IP0494	Mollusca	Gastropoda	Nudibranchia	Chromodorididae	Mexichromis	trilineata	Felimare	villafranca	1	98	Mollusca	Gastropoda	98.71	Pulau Tekukor	Reef 0 - 12	20161208	short	ZRC.MOL.010751	MN690311
IP0495	Mollusca	Gastropoda	Sacoglossa	Plakobranchidae	Elysia									Pulau Tekukor	Reef 0 - 12	20161208
IP0496	Mollusca	Gastropoda	Sacoglossa	Plakobranchidae	Elysia		Elysia			89	Elysia		89.32	Pulau Tekukor	Reef 0 - 12	20161208	short		MN690323
IP0497	Porifera													Pulau Tekukor	Reef 0 - 12	20161208
IP0498	Porifera	Demospongiae	Axinellida	Stelligeridae			Stelligera	rigida		90	Axos	cliftoni	89.64	Pulau Tekukor	Reef 0 - 12	20161208	short	ZRC.POR. 0486	MN690409
IP0499	Porifera	Demospongiae	Haplosclerida	Petrosiidae										Pulau Tekukor	Reef 0 - 12	20161208
IP0500	Porifera													Pulau Tekukor	Reef 0 - 12	20161208
IP0501	Porifera													Pulau Tekukor	Reef 0 - 12	20161208
IP0502	Cnidaria	Hydrozoa												Pulau Tekukor	Reef 0 - 12	20161208
IP0503	Porifera													Pulau Tekukor	Reef 0 - 12	20161208
IP0504	Cnidaria	Hydrozoa												Pulau Tekukor	Reef 0 - 12	20161208		ZRC.CNI.1290
IP0505	Chordata	Ascidiacea												Pulau Tekukor	Reef 0 - 12	20161208
IP0506	Cnidaria	Anthozoa	Alcyonacea	Plexauridae			Heterogorgia	verrucosa		94	Acanthogorgia	aspera	100	Pulau Tekukor	Reef 0 - 12	20161208	short	ZRC.CNI.1291	MN690406
IP0507	Mollusca	Gastropoda	Neogastropoda	Muricidae	Drupella	margariticola	Ergalatax	margariticola	0	97	Drupella	margariticola	100	Pulau Tekukor	Reef 0 - 12	20161208	short	ZRC.MOL.010752	MN690200
IP0508	Mollusca	Gastropoda	Neogastropoda	Muricidae	Mancinella	echinata	Mancinella	echinata	0	97	Mancinella	echinata	100	Pulau Tekukor	Reef 0 - 12	20161208	short	ZRC.MOL.010753	MN690185
IP0509	Arthropoda	Malacostraca	Decapoda				Cricotopus	bicinctus		82	Culicoides		84.21	Pulau Tekukor	Reef 0 - 12	20161208	short		MN690045
IP0510	Arthropoda	Malacostraca	Decapoda				Culex	restuans		82	Eumunida	sternomaculata	84.07	Pulau Tekukor	Reef 0 - 12	20161208	short		MN690047
IP0511	Cnidaria	Anthozoa	Actiniaria	Allicidae			Actiniaria			100	Actiniaria		100	Pulau Tekukor	Reef 0 - 12	20161208	short		MN690375
IP0512	Cnidaria	Anthozoa	Actiniaria	Nemanthidae	Nemanthus		Stephanauge	nexilis		96	Anthozoa		98.38	Pulau Tekukor	Reef 0 - 12	20161208	short		MN690370
IP0513	Mollusca	Gastropoda	Nudibranchia	Dendrodorididae	Dendrodoris		Dendrodoris	nigra		93	Dendrodoris	nigra	87.81	Pulau Subar Laut	Big lagoon	20170212	short		MN690568
IP0514	Mollusca	Gastropoda	Polyplacophora	Chitonidae			Tonicia	forbesii		84	Lucilina		88.67	Pulau Subar Laut	Big lagoon	20170212	short	ZRC.MOL.010754	MN690451
IP0515	Arthropoda	Malacostraca	Decapoda	Calappidae	Calappa	philargius	Calappa	bilineata	1	98	Calappa	bilineata	99.68	Pulau Subar Laut	Big lagoon	20170212	short	ZRC 2017.0062	MN690034
IP0516	Echinodermata	Echinoidea	Diadematoida	Diadematidae	Echinothrix		Echinothrix	calamaris		95	Echinothrix	calamaris	98.88	Pulau Subar Laut SW	Reef 0 -12 m	20170417	short		MN690264
IP0517	Mollusca	Gastropoda	Sacoglossa	Costasiellidae	Costasiella		Costasiella	usagi		90	Costasiella	usagi	89.74	Pulau Subar Laut	Big lagoon	20170611	short		MN690319
IP0518	Mollusca	Gastropoda	Nudibranchia	Discodorididae	Tayuva	lilacina	Rostanga	calumus	0	86	Discodoris	lilacina	86.14	Pulau Subar Laut	Big lagoon	20170611	short		MN690331
IP0519	Annelida	Polychaeta	Phyllodocida	Nereididae			Perinereis	camiguinoides		80	Phyllodocida		99.02	Pulau Subar Laut	Big lagoon	20170611	short	ZRC.ANN.0374	MN690452
IP0520	Mollusca	Gastropoda	-	Trochidae			Austrocochlea	porcata		82	Microtis	tuberculata	83.93	Pulau Subar Laut	Big lagoon	20170611	short		MN690214
IP0521	Chordata	Actinopterygii	Perciformes	Serranidae			Pseudanthias	dispar		85	Neopomacentrus	bankieri	99.68	Pulau Subar Laut SW	Reef 0 - 12	20170717	short		MN690440
IP0522	Mollusca	Gastropoda	Nudibranchia	Chromodorididae	Cadlinella		Cadlinella	ornatissima		91	Cadlinella	ornatissima	91.03	Pulau Subar Laut SW	Reef 0 - 12	20170717	short	ZRC.MOL.010756	MN690329
IP0523	Mollusca	Gastropoda	Littorinimorpha	Ovulidae	Phenacovolva	tokioi	Phenacovolva	tokioi	0	99	Phenacovolva	tokioi	99.65	Pulau Subar Laut SW	Reef 0 - 12	20170717	short		MN690194
IP0524	Arthropoda	Malacostraca	Decapoda	Palaemonidae	Cuapetes	tenuipes	Cuapetes	tenuipes	0	99	Decapoda		87.22	Pulau Subar Laut SW	Reef 0 - 12	20170717	long	ZRC 2017.1133	MN690032
IP0525	Platyhelminthes	Rhabditophora	Polycladida				Platyheminthes			82	Platyhelminthes		82.69	Pulau Subar Laut SW	Reef 0 - 12m	20170717	short	ZRC.PLA.0366	MN690529
IP0526	Platyhelminthes	Rhabditophora	Polycladida				Platyheminthes			82	Platyhelminthes		78.62	Pulau Subar Laut SW	Reef 0 - 12m	20170717	short		MN690530
IP0527	Cnidaria	Hydrozoa					Obelia	geniculata		83	Junceella		94.92	Pulau Subar Laut SW	Reef 0 - 12	20170717	long	ZRC.CNI.1292	MN690413
IP0528	Mollusca	Bivalvia	Ostreida	Pteriidae	Isognomon									Pulau Subar Laut SW	Reef 0 - 12	20170717		ZRC.MOL.010757
IP0529	Chordata	Actinopterygii	Perciformes	Gobiidae										Pulau Subar Laut SW	Reef 0 - 12	20170717
IP0530	Cnidaria	Anthozoa	Antipatharia	Antipathidae			Antipathes	griggi		100	Alcyonacea		100	Pulau Subar Laut SW	Reef 0 - 12	20170717	short	ZRC.CNI.1293	MN690376
IP0531	Arthropoda	Malacostraca	Decapoda	Upogebiidae			Austinogebia	wuhsienweni		85	Dolichopodidae		86.79	Pulau Subar Laut SW	Reef 0 - 12	20170717	short	ZRC 2017.1134	MN690050
IP0532	Platyhelminthes	Rhabditophora	Polycladida				Platyheminthes			82	Platyhelminthes		77.38	Pulau Subar Laut SW	Reef 0 - 12m	20170717	short		MN690531
IP0533	Mollusca	Gastropoda	Nudibranchia	Dotidae	Doto		Doto			99	Doto		99.68	Pulau Subar Laut SW	Reef 0 - 12	20170717	short		MN690313
IP0534	Arthropoda	Malacostraca	Decapoda	Palaemonidae	Hamodactylus		Hamodactylus	noumeae		98	Hamodactylus	noumeae	98.95	Pulau Subar Laut SW	Reef 0 - 12	20170717	short	ZRC 2017.1135	MN690280
IP0535	Mollusca	Gastropoda	Nudibranchia	Dotidae	Doto		Doto			99	Doto		98.93	Pulau Subar Laut SW	Reef 0 - 12	20170717	long		MN690314
IP0536	Mollusca	Gastropoda	-	Solariellidae			Bathymophila			78	Gibbula	umbilicaris	80.07	Pulau Subar Laut SW	Reef 0 - 12	20170717	short		MN690486
IP0537	Mollusca	Gastropoda	-	Solariellidae			Metaphire	sieboldi		78	Gibbula	umbilicaris	78.53	Pulau Subar Laut SW	Reef 0 - 12	20170717	short		MN690487
IP0538	Arthropoda	Malacostraca	Amphipoda				Gammarus	dacicus		84	Amphipoda		80.13	Pulau Subar Laut SW	Reef 0 - 12	20170717	short		MN690333
IP0539	Mollusca	Gastropoda	Neogastropoda	Conidae	Conus	mustelinus	Conus	mustelinus	0	97	Conus	mustelinus	97.44	Pulau Subar Laut SW	Reef 0 - 12	20170717	short	ZRC.MOL.010759	MN690193
IP0540	Mollusca	Gastropoda	Nudibranchia	Arminidae	Dermatobranchus		Dermatobranchus			97	Dermatobranchus		96.59	Pulau Subar Laut SW	Reef 0 - 12	20170717	long		MN690304
IP0541	Mollusca	Gastropoda	Nudibranchia	Dotidae			Doto			86	Doto		86.83	Pulau Subar Laut SW	Reef 0 - 12	20170717	long		MN690305
IP0542	Cnidaria	Hydrozoa	Anthoathecata	Tubulariidae	Zyzzyzus		Zyzzyzus	warreni		96	Zyzzyzus	warreni	96.17	Pulau Subar Laut SW	Reef 0 - 12	20170717	short	ZRC.CNI.1294	MN690414
IP0543	Arthropoda	Malacostraca	Tanaidacea				Lepidoptera			79	Gnamptogenys		79.2	Pulau Subar Laut SW	Reef 0 - 12	20170717	short	ZRC 2017.1136	MN690569
IP0544	Arthropoda	Malacostraca	Amphipoda				Hypsoprora	nogolata		81	Amphipoda		80.45	Pulau Subar Laut SW	Reef 0 - 12	20170717	short		MN690334
IP0545	Chordata	Actinopterygii	Perciformes	Sillaginidae	Sillago	aeolus	Sillago	aeolus	0	100	Sillago	maculata	100	Pulau Subar Laut	Big lagoon	20170723	long		MN690437
IP0546	Chordata	Actinopterygii	Perciformes	Gobiidae	Periophthalmus	chrysospilos	Periophthalmus	barbarus	0	90	Periophthalmus	barbarus	89.81	Pulau Subar Laut	Small lagoon	20170723	long		MN690438
IP0547	Chordata	Actinopterygii	Perciformes	Centrogenyidae	Centrogenys	vaigiensis	Leporinus			85	Centrogenys	vaigiensis	100	Pulau Subar Laut	Big lagoon	20170723	short		MN690435
IP0548	Chordata	Actinopterygii	Beloniformes	Hemiramphidae	Zenarchopterus		Zenarchopterus	dispar		92	Beloniformes		97.73	Pulau Subar Laut	Small lagoon	20170723	short		MN690442
IP0549	Chordata	Actinopterygii	Perciformes	Gerreidae	Gerres		Gerres	oyena		98	Gerres	japonicus	100	Pulau Subar Laut	Small lagoon	20170723	short		MN690422
IP0550	Chordata	Actinopterygii	Beloniformes	Hemiramphidae	Zenarchopterus		Zenarchopterus			97	Zenarchopterus		96.76	Pulau Subar Laut	Big lagoon	20170723	long		MN690439
IP0551	Chordata	Actinopterygii	Perciformes	Mugilidae	Ellochelon	vaigiensis	Ellochelon	vaigiensis	0	100	Ellochelon	vaigiensis	100	Pulau Subar Laut	Small lagoon	20170723	short		MN690441
IP0552	Arthropoda	Malacostraca	Isopoda				Cymodoce	tribullis		87	Cymodoce	tribullis	87.18	Pulau Subar Laut	Big lagoon	20170723	short		MN690162
IP0553	Mollusca	Gastropoda	Sacoglossa	Plakobranchidae			Elysia	chilkensis		84	Gascoignella	nukuli	84.4	Pulau Subar Laut	Big lagoon	20170723	long		MN690320
IP0554	Chordata	Actinopterygii	Batrachoidiformes	Batrachoididae	Batrachomoeus		Batrachomoeus	trispinosus		92	Batrachomoeus	trispinosus	92.45	Pulau Subar Laut	Big lagoon	20170723	short		MN690450
IP0555	Mollusca	Gastropoda	Sacoglossa	Plakobranchidae			Elysia	chilkensis		85	Gascoignella	nukuli	84.69	Pulau Subar Laut	Big lagoon	20170723	long		MN690321
IP0556	Chordata	Actinopterygii	Perciformes	Blenniidae	Entomacrodus	stellifer	Entomacrodus	stellifer	0	99	Entomacrodus	stellifer	99.67	Pulau Subar Laut	Big lagoon	20170723	short		MN690443
IP0557	Chordata	Actinopterygii	Perciformes	Haemulidae	Plectorhinchus	chaetodonoides	Plectorhinchus	gibbosus	1	97	Plectorhinchus	gibbosus	99.39	Pulau Subar Laut	Big lagoon	20170723	short		MN690445
IP0558	Arthropoda	Malacostraca	Decapoda	Penaeidae			Melicertus	latisulcatus		89	Penaeidae		88.37	Pulau Subar Laut	Big lagoon	20170723	short	ZRC 2017.1137	MN690094
IP0559	Echinodermata	Holothuroidea	Aspidochirotida	Holothuriidae	Holothuria		Holothuria	notabilis		97	Holothuria	notabilis	99.06	Pulau Subar Laut	Small lagoon	20170723	short	ZRC.ECH.1255	MN690253
IP0560	Chordata	Actinopterygii	Anguilliformes	Ophichthidae	Ophichthus	lithinus	Ophichthus	lithinus	0	98	Ophichthus	lithinus	99.65	Pulau Subar Laut	Big lagoon	20170723	short		MN690444
IP0561	Mollusca	Gastropoda	Nudibranchia	Polyceridae			Polycera	capensis		87	Polycera	capensis	86.67	Pulau Subar Laut	Big lagoon	20170723	short		MN690326
IP0562	Cnidaria	Anthozoa	Actiniaria	Haloclavidae	Peachia		Bolocera			97	Peachia		98.1	Pulau Subar Laut	Small lagoon	20170723	short		MN690367
LEX085	Arthropoda	Malacostraca	Isopoda	Ligiidae	Ligia		Ligia	dentipes		80	Ligia	exotica	82.42	Pulau Subar Laut	Big lagoon	20151229	short		MN690476
OTC-0391	Platyhelminthes	Rhabditophora	Polycladida	Pseudocerotidae	Thysanozoon	nigropapillosum	Pseudobiceros	bedfordi	0	83	Turbellaria		82.31	Pulau Subar Laut	OTR454	Rene	long		MN690542
